# Supplementary material for: Synthesis and cytotoxic activity of unsaturated macrolides and their hybrid molecules with a C60 fullerene
Source: Royal Society of Chemistry journal article supplement (doi:10.1039/d1ob00023c), 2021-01-01
Supplement: d1ob00023c1.pdf [file d1ob00023c1.pdf]

*Supporting Information*

**Synthesis and Cytotoxic Activity of Unsaturated Macrolides  
and their Hybrid Molecules with C<sub>60</sub> Fullerene**

A. R. Tuktarov,\* L. L. Khuzina, Z. R. Sadretdinova, E. Kh. Makarova, L. U. Dzhemileva,\* V. A.  
D'yakonov, U. M. Dzhemilev

Institute of Petrochemistry and Catalysis, Russian Academy of Sciences. 141 Pr. Oktyabrya, Ufa,  
450075, Russia

## Table of Contents

|                                                                                                        |        |
|--------------------------------------------------------------------------------------------------------|--------|
| Copies of $^1\text{H}$ NMR, $^{13}\text{C}$ NMR, COSY, HMBC, HSQC spectra of compound <b>4</b>         | S3-5   |
| Copies of $^1\text{H}$ NMR, $^{13}\text{C}$ NMR, COSY, HMBC,HSQC spectra of compound <b>5</b>          | S5-7   |
| Copies of $^1\text{H}$ NMR, $^{13}\text{C}$ NMR spectra of compound <b>6</b>                           | S8     |
| Copies of $^1\text{H}$ NMR, $^{13}\text{C}$ NMR spectra of compound <b>9</b>                           | S9     |
| Copies of $^1\text{H}$ NMR, $^{13}\text{C}$ NMR spectra of compound <b>10</b>                          | S10    |
| Copies of $^1\text{H}$ NMR, $^{13}\text{C}$ NMR, COSY, HMBC, HSQC, MALDI spectra of compound <b>11</b> | S11-13 |
| Copies of $^1\text{H}$ NMR, $^{13}\text{C}$ NMR, COSY, HMBC, HSQC, MALDI spectra of compound <b>12</b> | S14-16 |
| Copies of $^1\text{H}$ NMR, $^{13}\text{C}$ NMR, COSY, HMBC, HSQC, MALDI spectra of compound <b>13</b> | S17-19 |
| Copies of $^1\text{H}$ NMR, $^{13}\text{C}$ NMR, COSY, HMBC, HSQC, MALDI spectra of compound <b>14</b> | S20-22 |
| Copies of $^1\text{H}$ NMR, $^{13}\text{C}$ NMR, COSY, HMBC, HSQC, MALDI spectra of compound <b>15</b> | S23-25 |
| Figure S46                                                                                             | S26    |

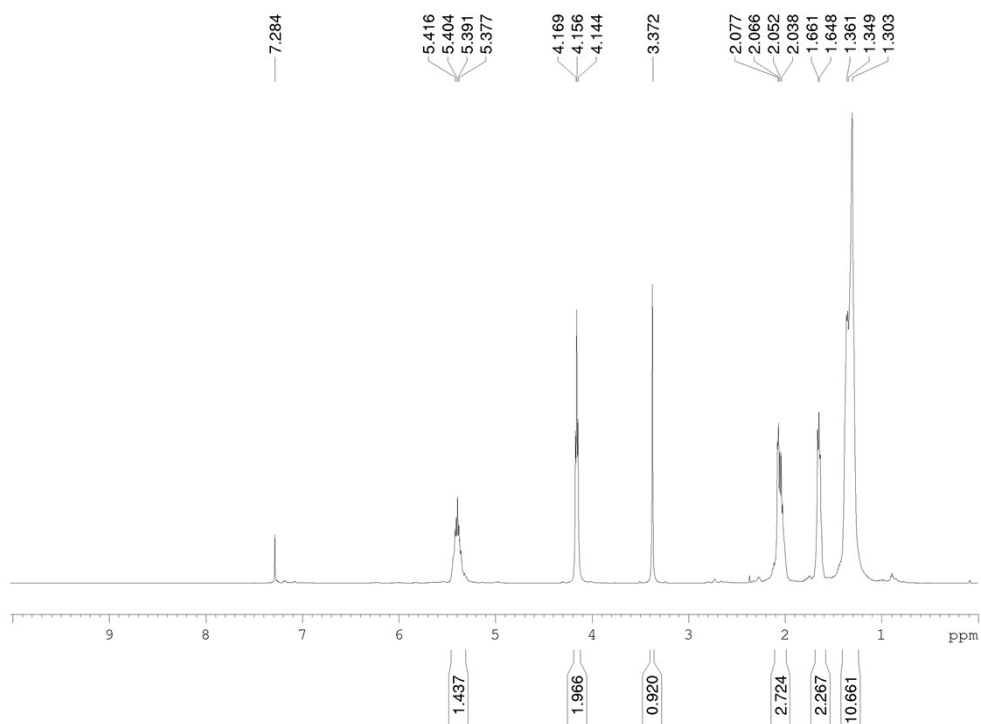

**Figure S1.** Copy of <sup>1</sup>H NMR spectra of compound 4

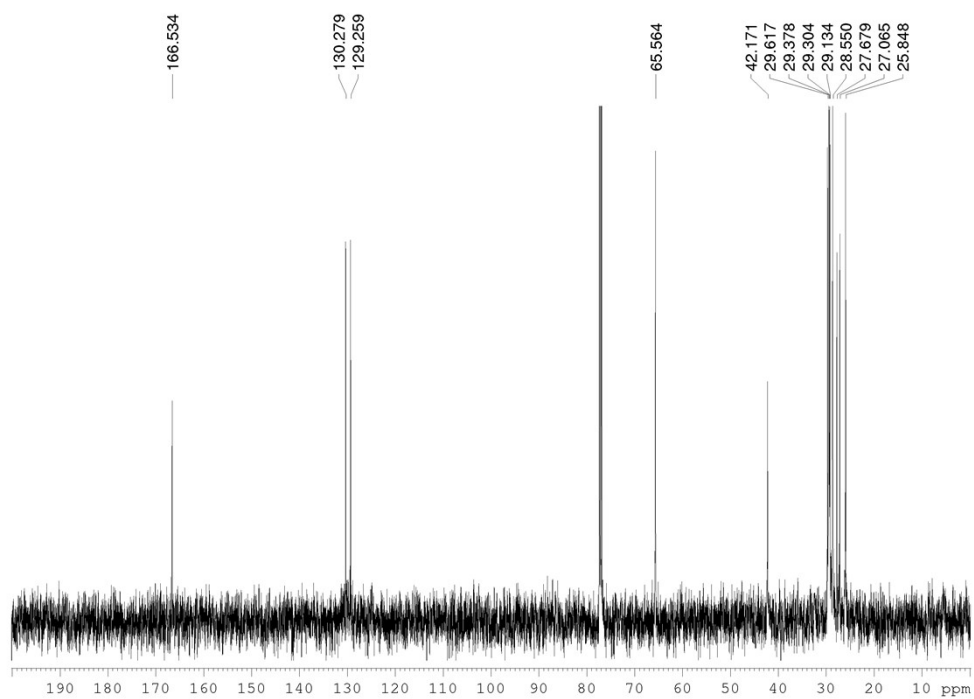

**Figure S2.** Copy of <sup>13</sup>C NMR spectra of compound 4

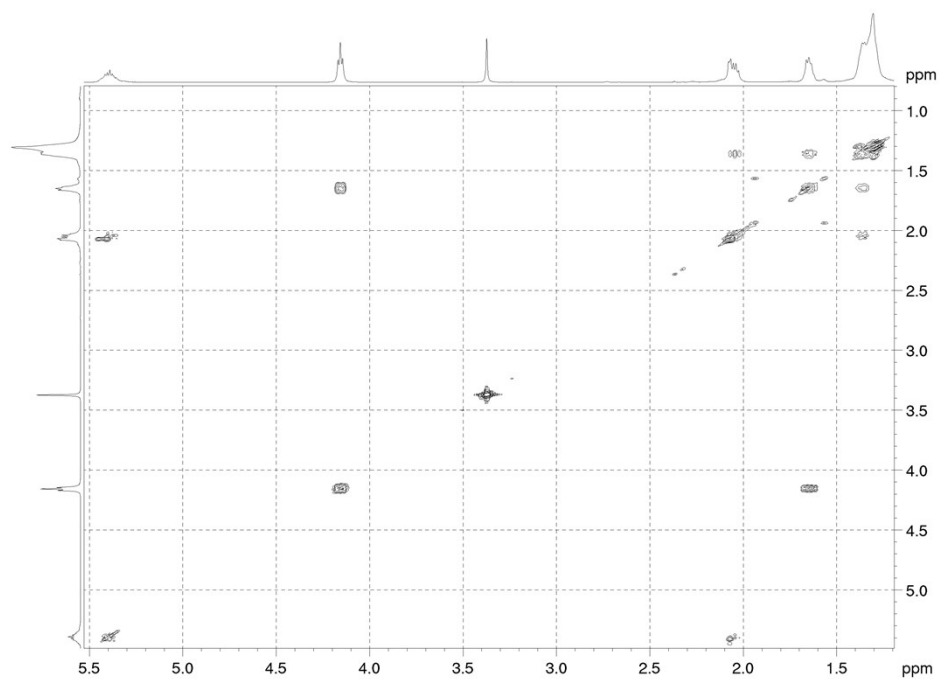

**Figure S3.** Copy of COSY spectra of compound 4

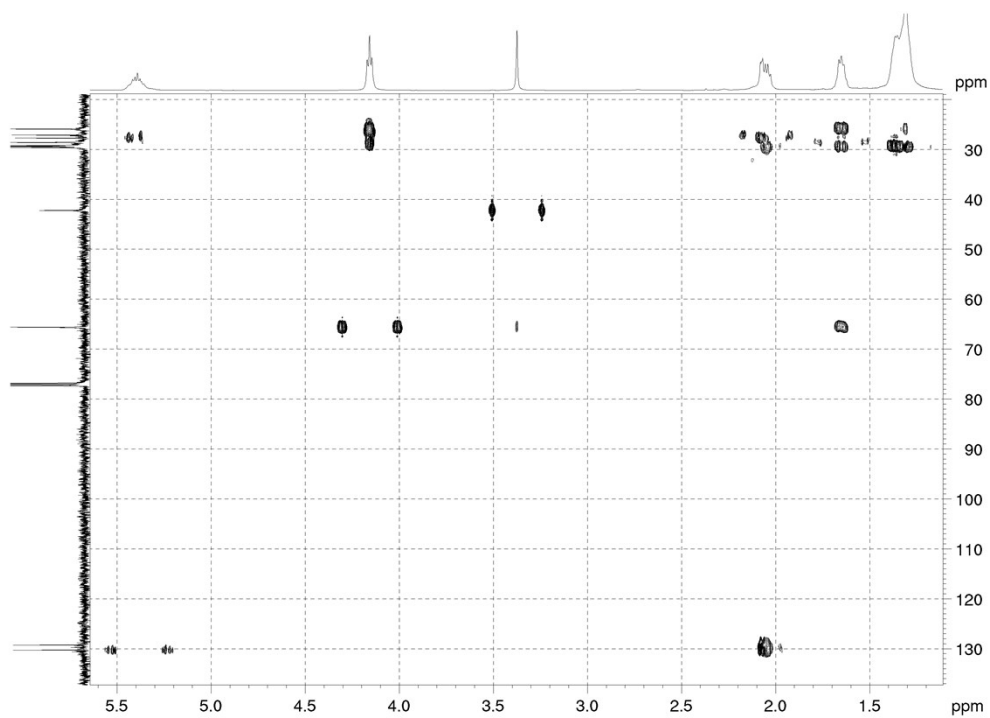

**Figure S4.** Copy of HMBC spectra of compound 4

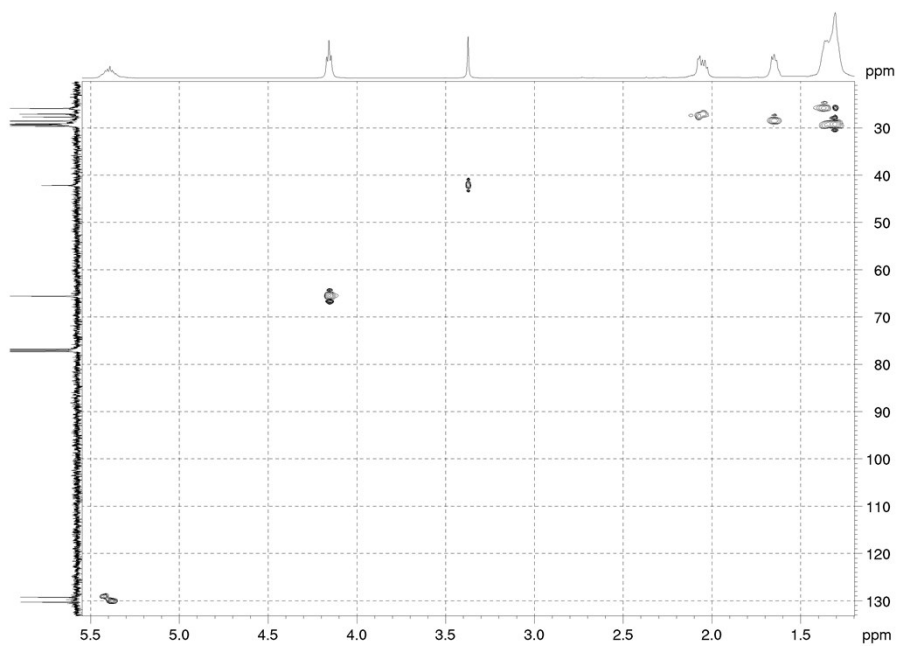

Figure S5. Copy of HSQC spectra of compound 4

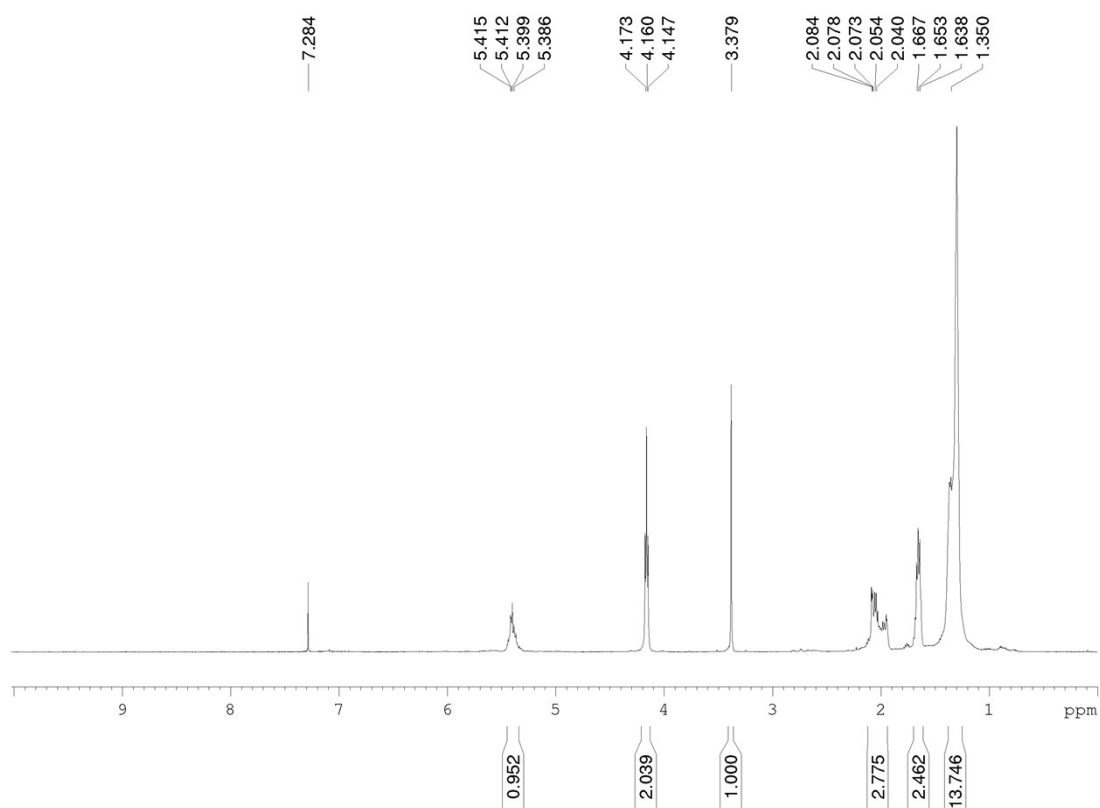

Figure S6. Copy of  $^1\text{H}$  NMR spectra of compound 5

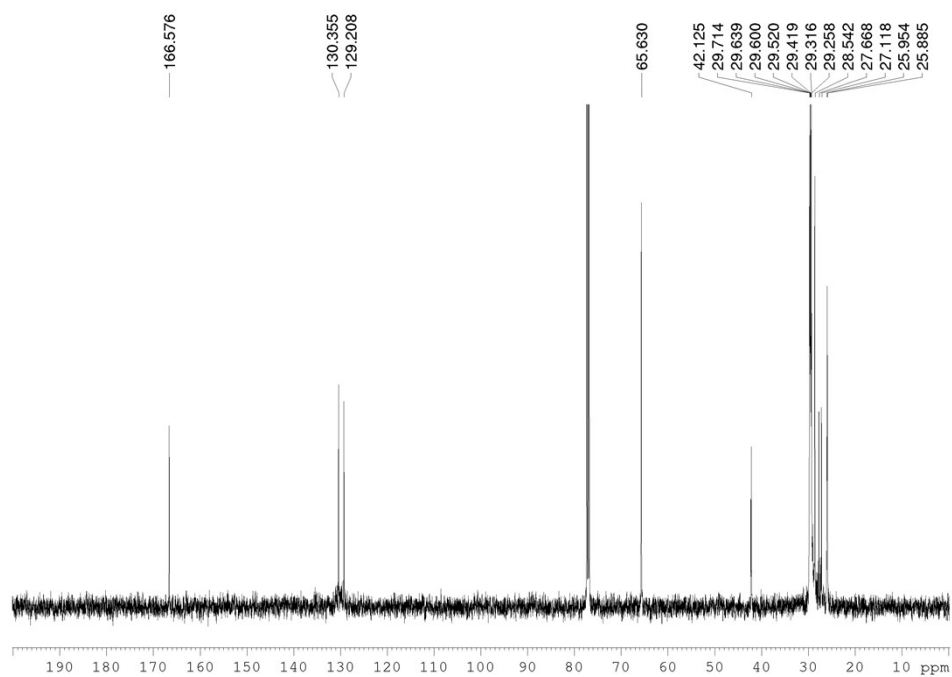

**Figure S6.** Copy of  $^{13}\text{C}$  NMR spectra of compound 5

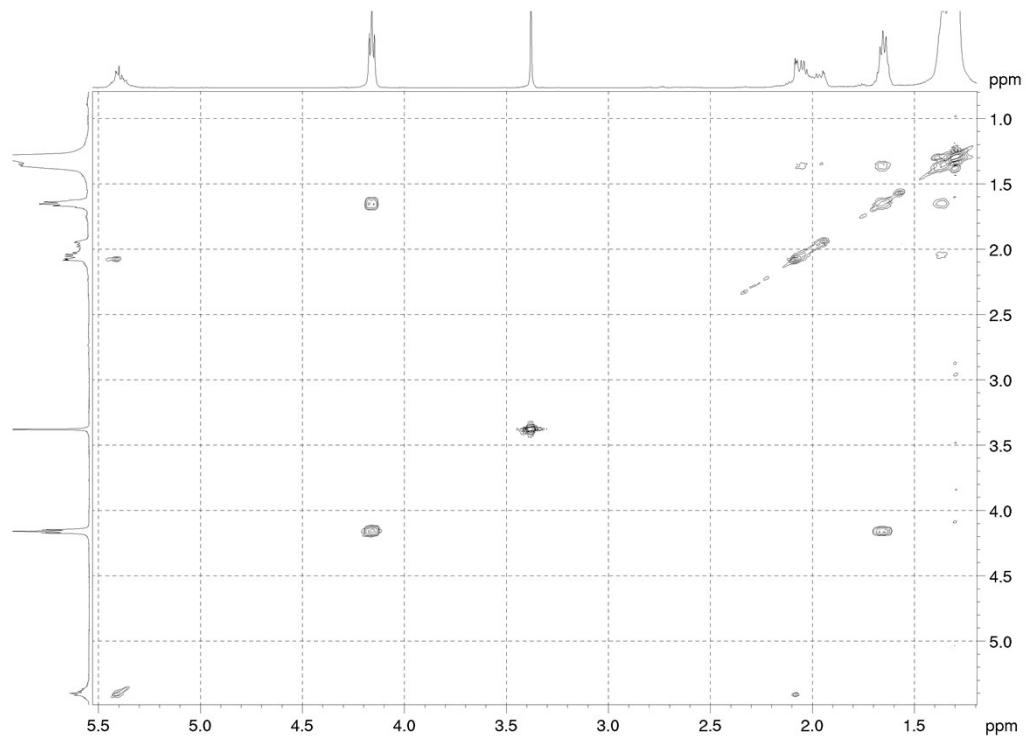

**Figure S7.** Copy of COSY spectra of compound 5

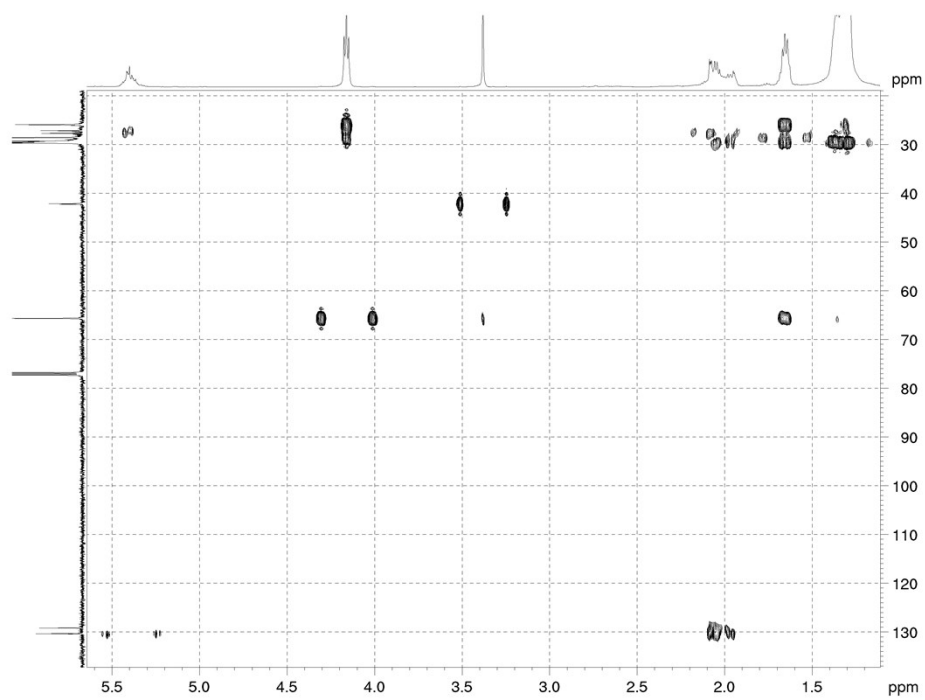

**Figure S8.** Copy of HMBC spectra of compound **5**

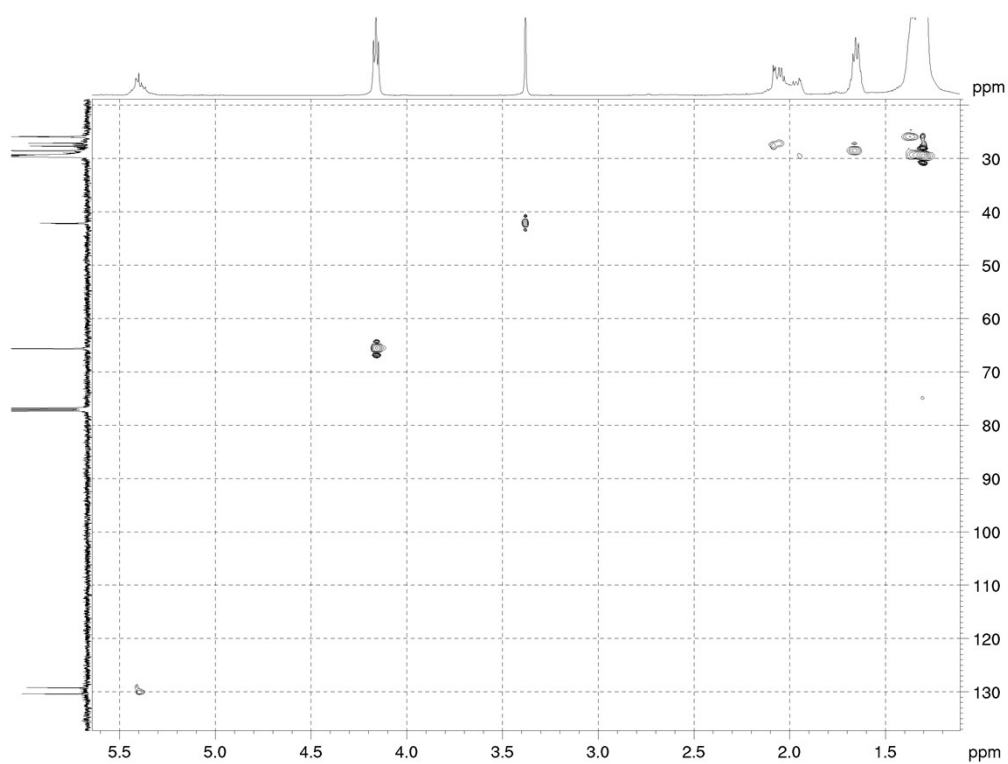

**Figure S9.** Copy of HSQC spectra of compound **5**

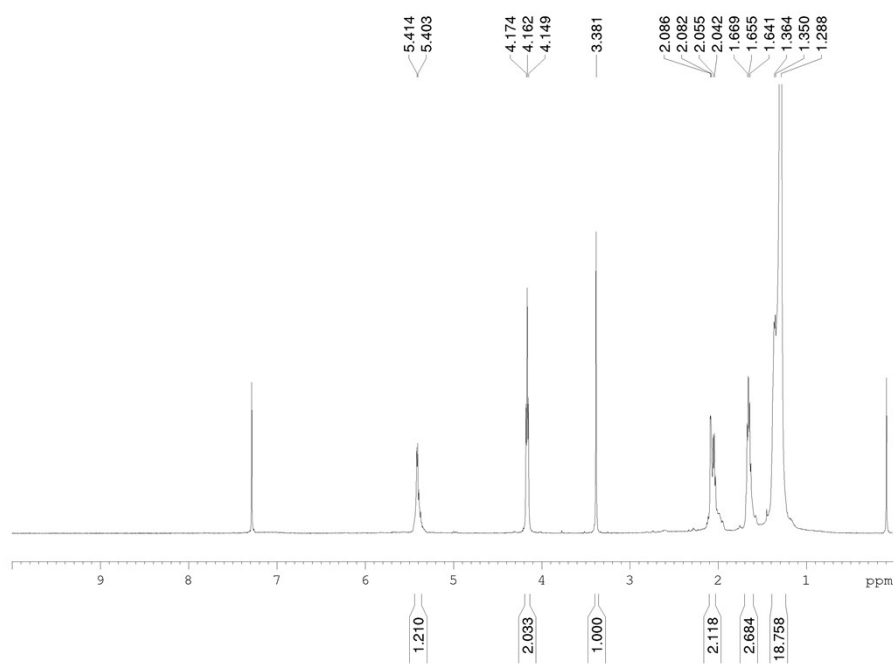

Figure S10. Copy of <sup>1</sup>H NMR spectra of compound 6

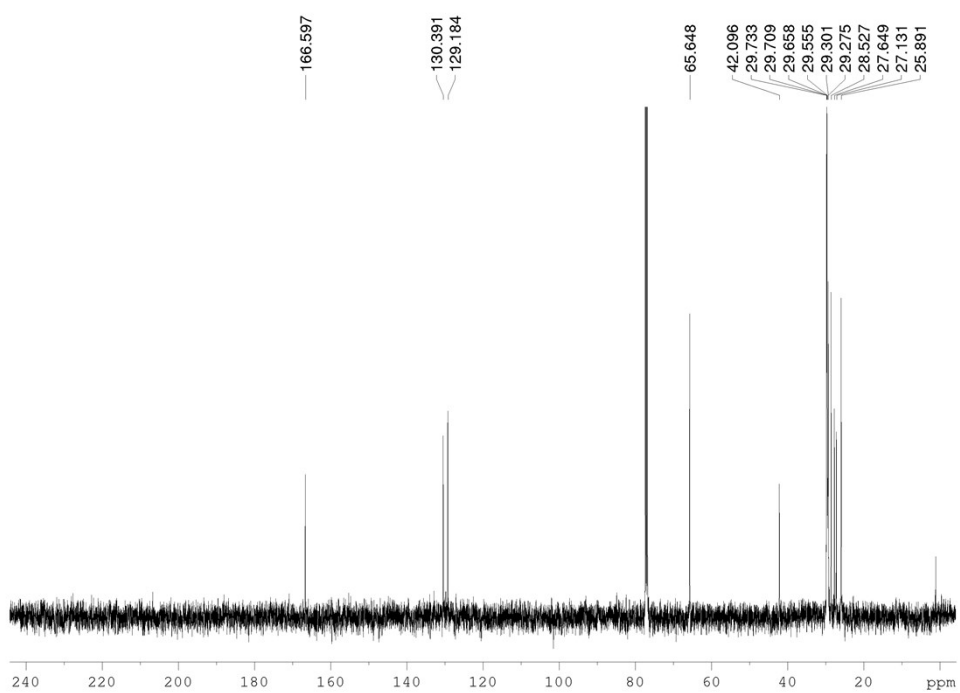

Figure S11. Copy of <sup>13</sup>C NMR spectra of compound 6



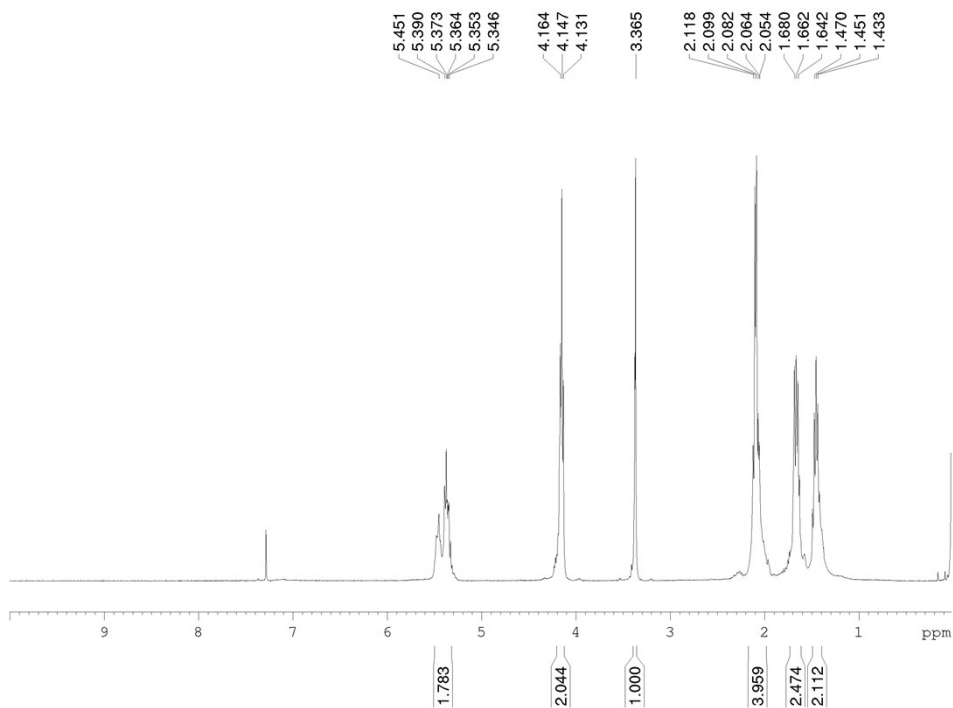

**Figure S12.** Copy of <sup>1</sup>H NMR spectra of compound **9**

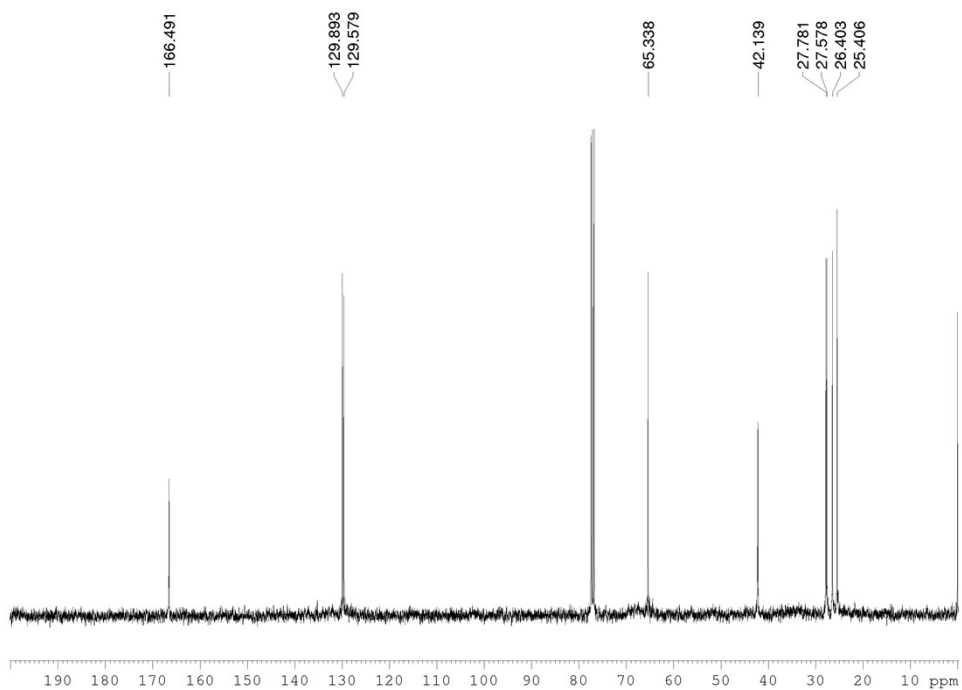

**Figure S13.** Copy of <sup>13</sup>C NMR spectra of compound **9**

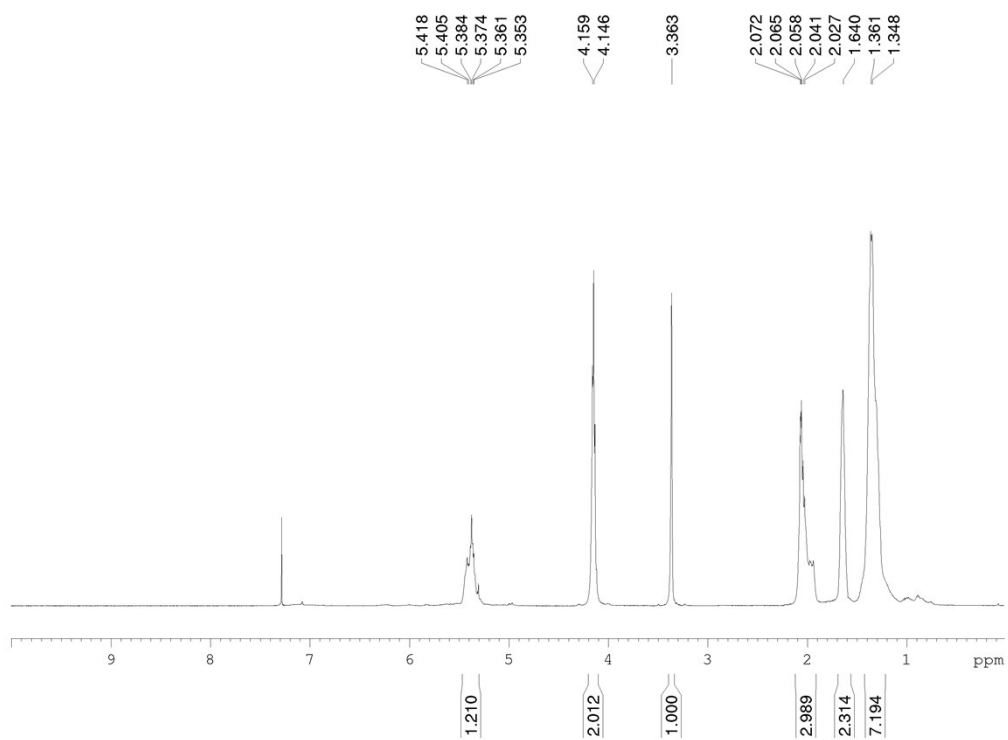

**Figure S14.** Copy of <sup>1</sup>H NMR spectra of compound **10**

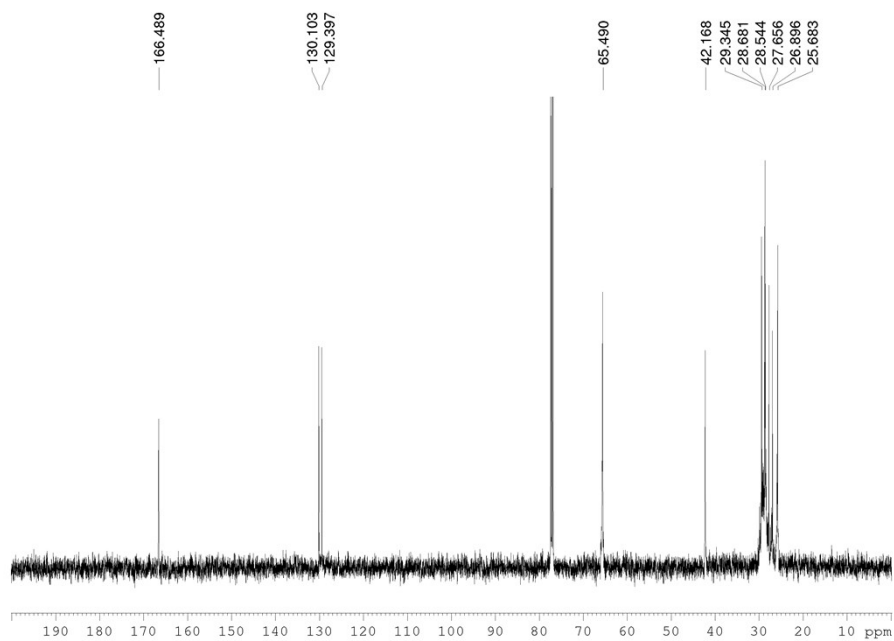

**Figure S15.** Copy of <sup>13</sup>C NMR spectra of compound **10**

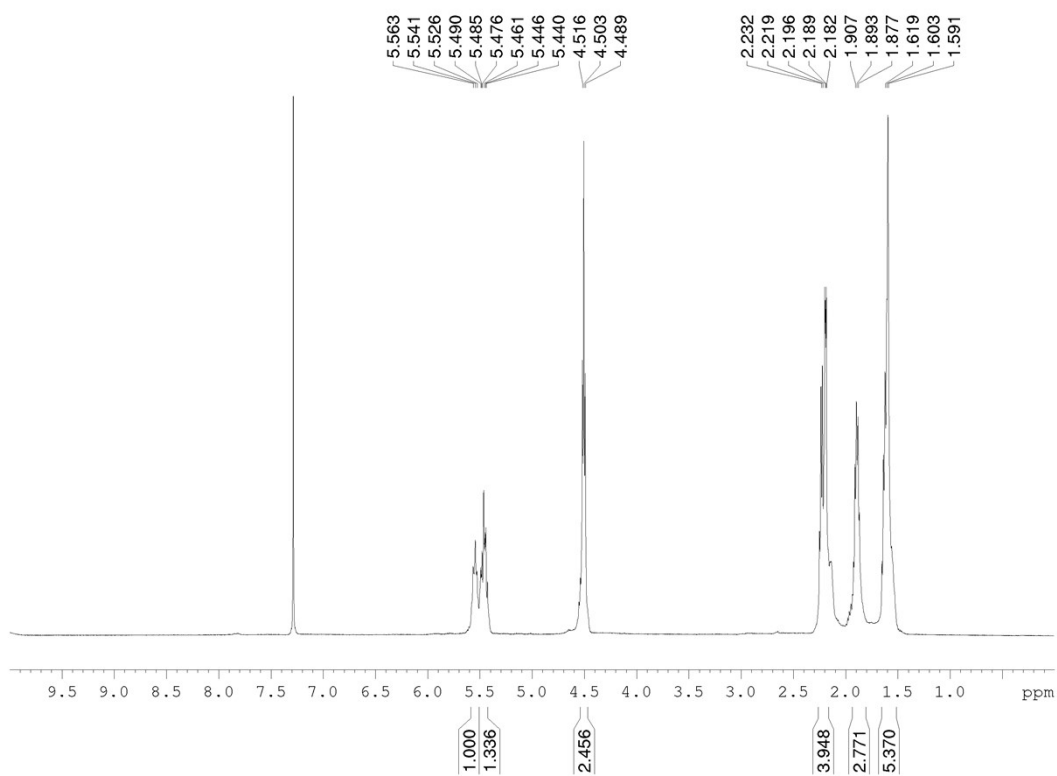

Figure S16. Copy of <sup>1</sup>H NMR spectra of compound 11

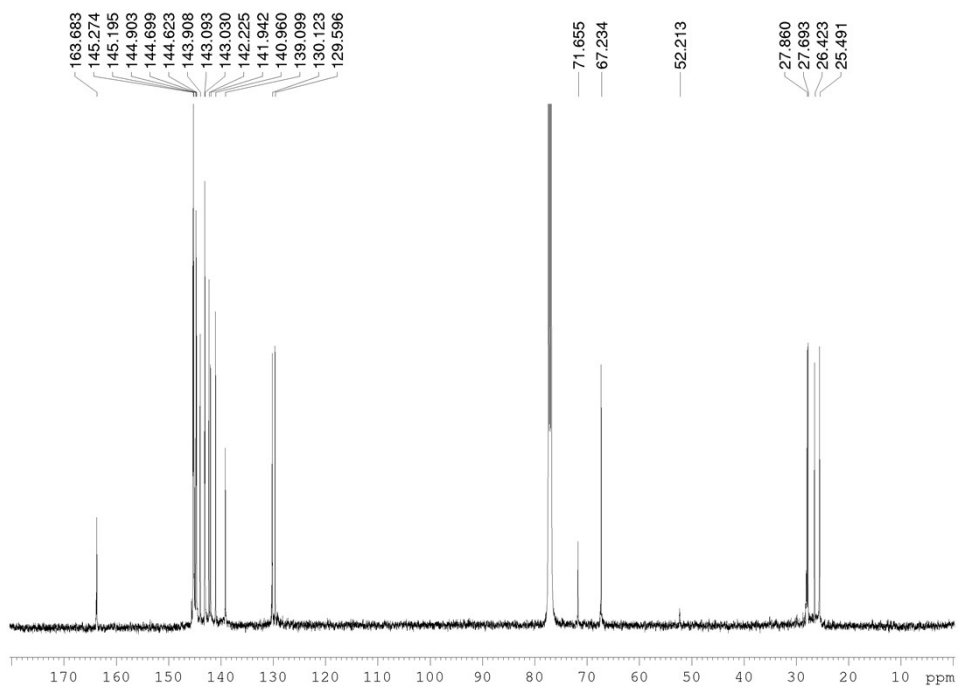

Figure S17. Copy of <sup>13</sup>C NMR spectra of compound 11

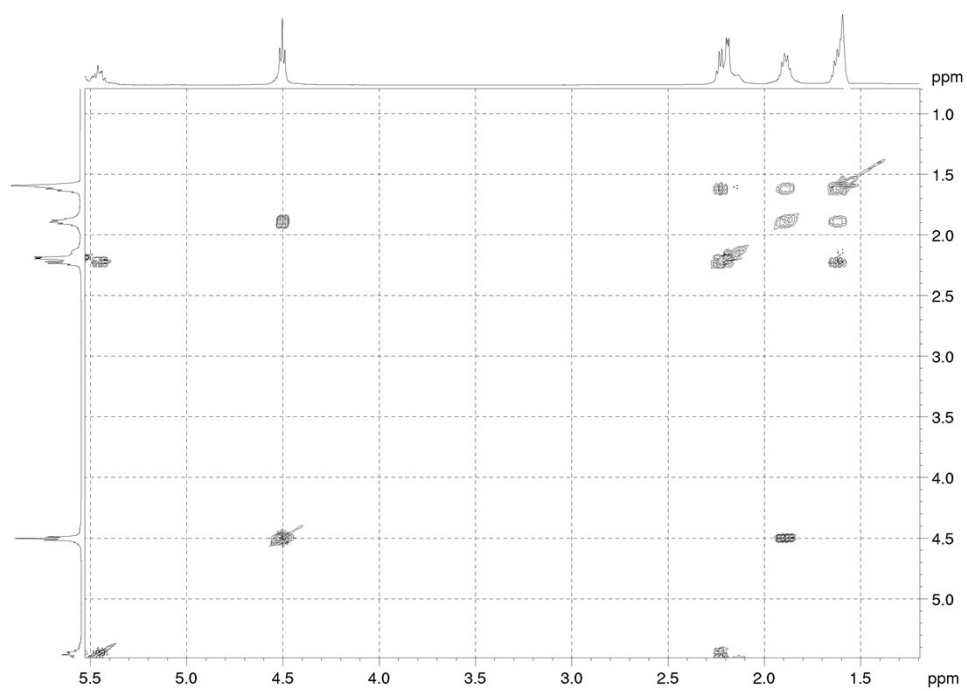

**Figure S18.** Copy of COSY NMR spectra of compound **11**

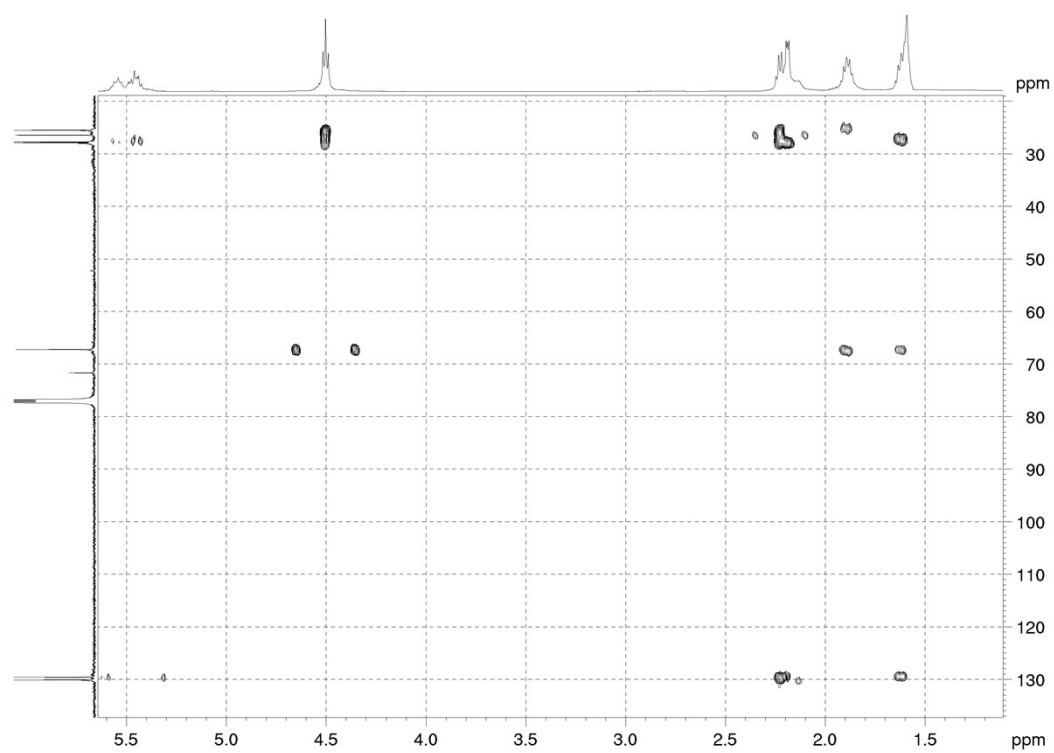

**Figure S 19.** Copy of HMBC NMR spectra of compound **11**

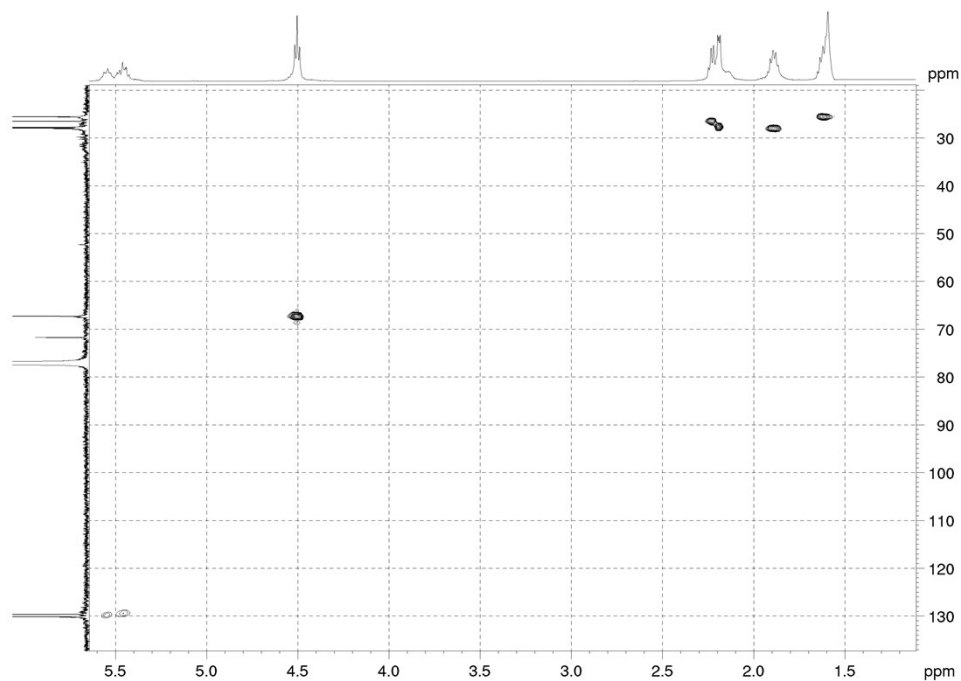

**Figure S20.** Copy of HSQC NMR spectra of compound 11

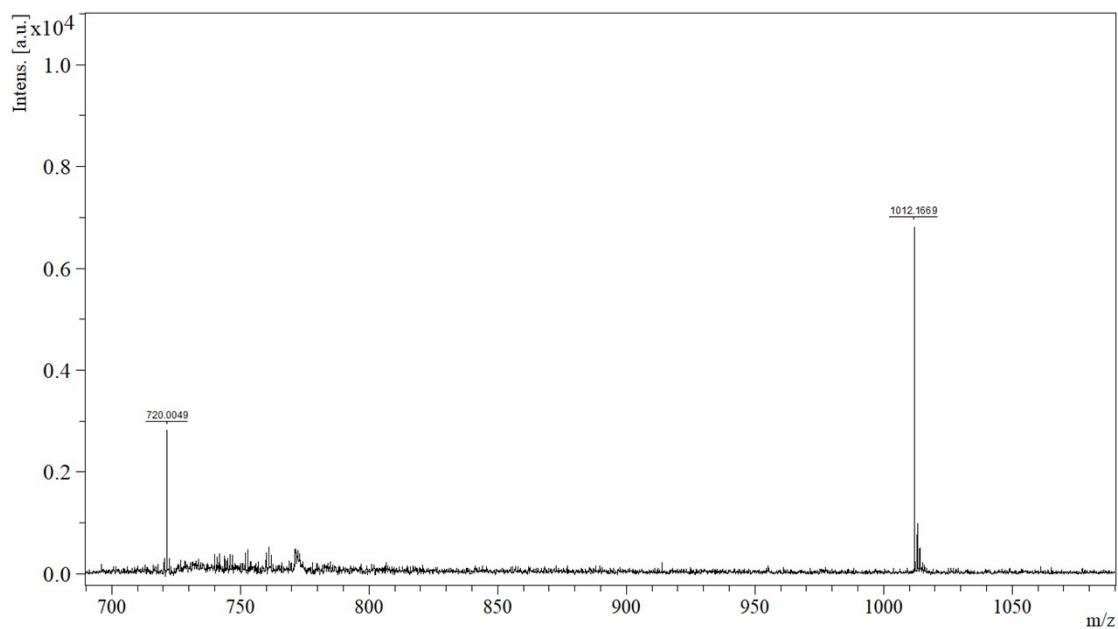

**Figure S21.** Copy of MALDI TOF spectra of compound 11

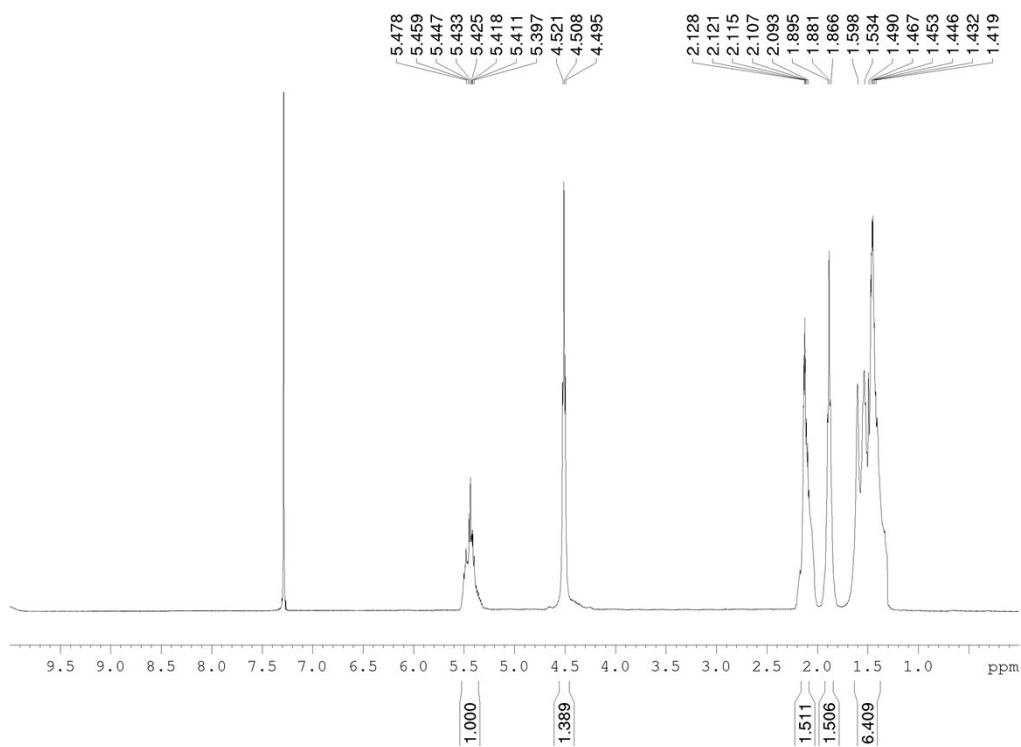

Figure S22. Copy of <sup>1</sup>H NMR spectra of compound 12

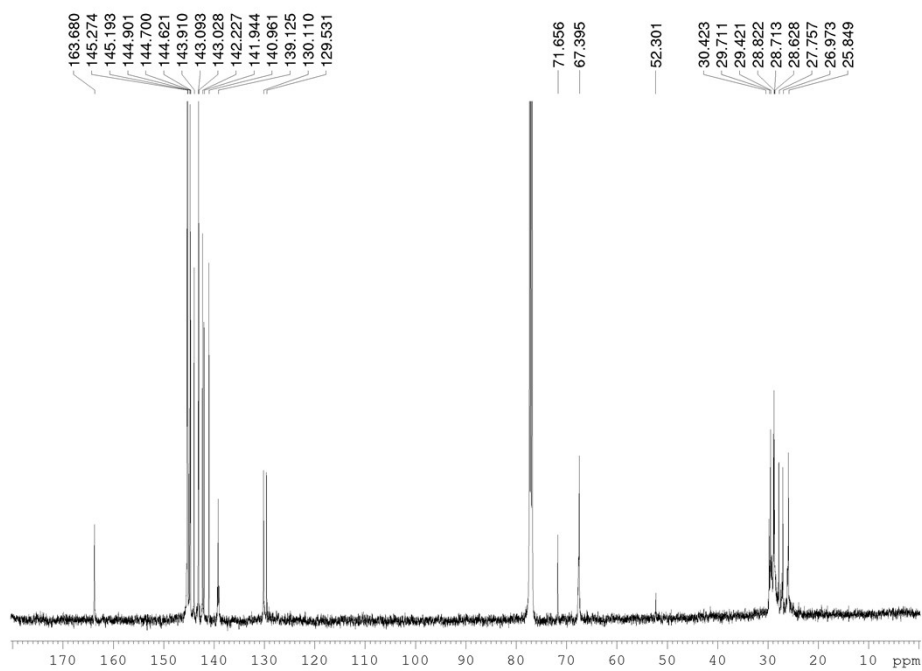

Figure S23. Copy of <sup>13</sup>C NMR spectra of compound 12

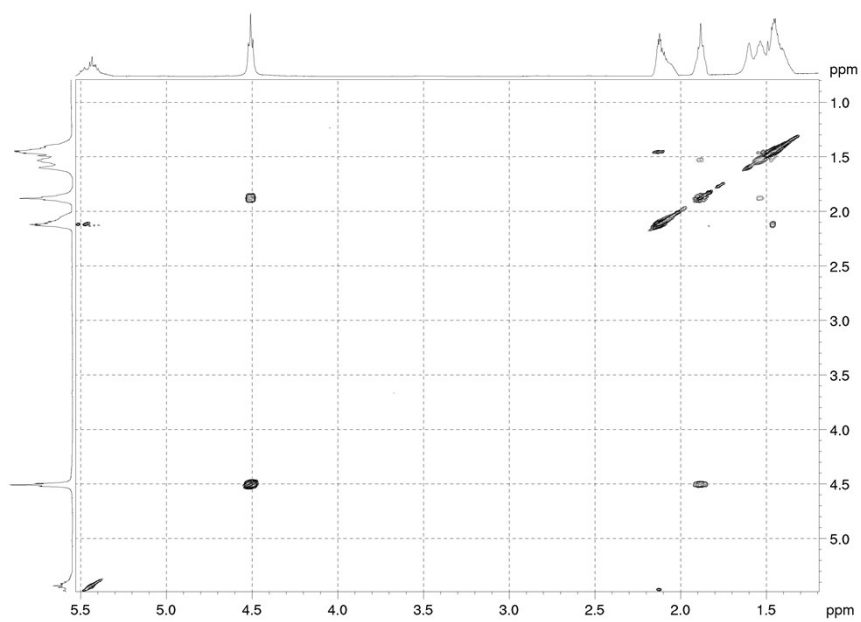

**Figure S24.** Copy of COSY NMR spectra of compound **12**

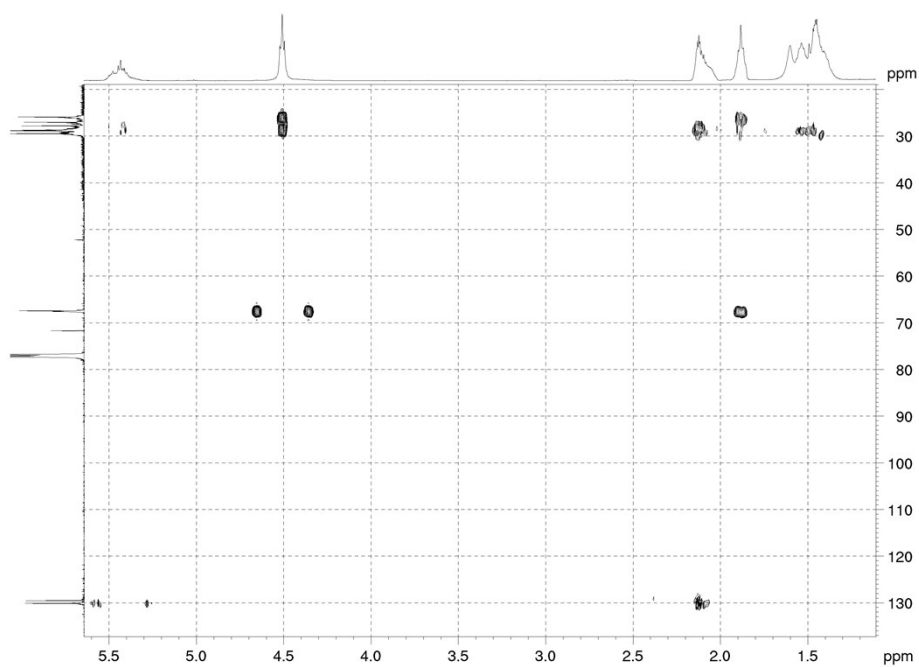

**Figure S25.** Copy of HMBC NMR spectra of compound **12**

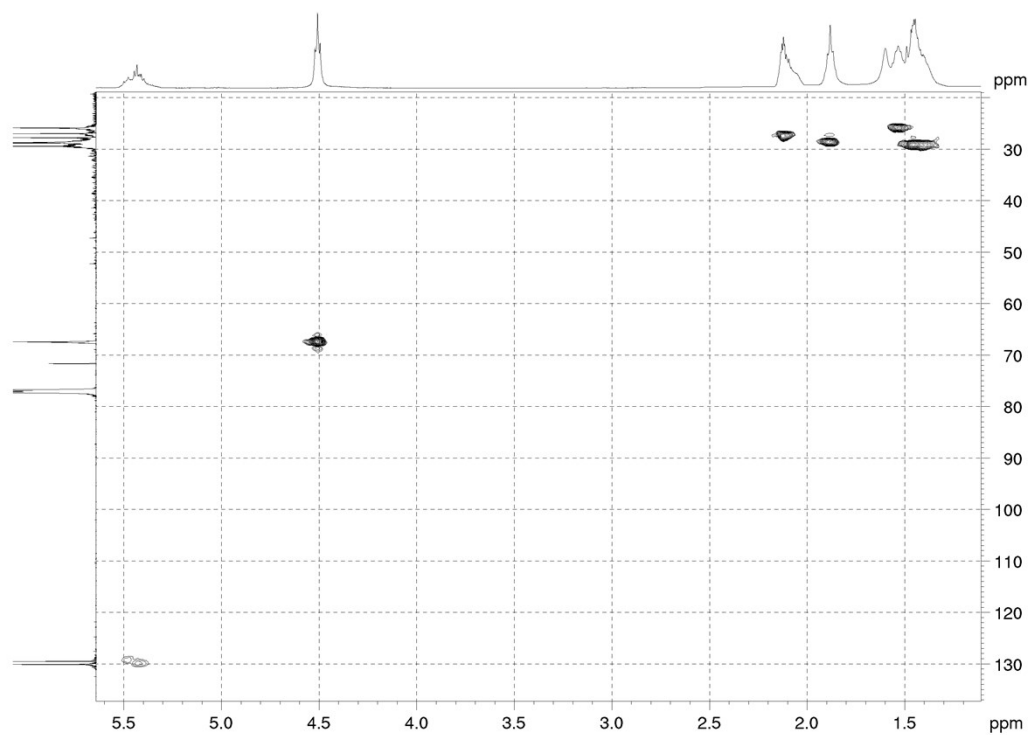

**Figure S26.** Copy of HSQC NMR spectra of compound **12**

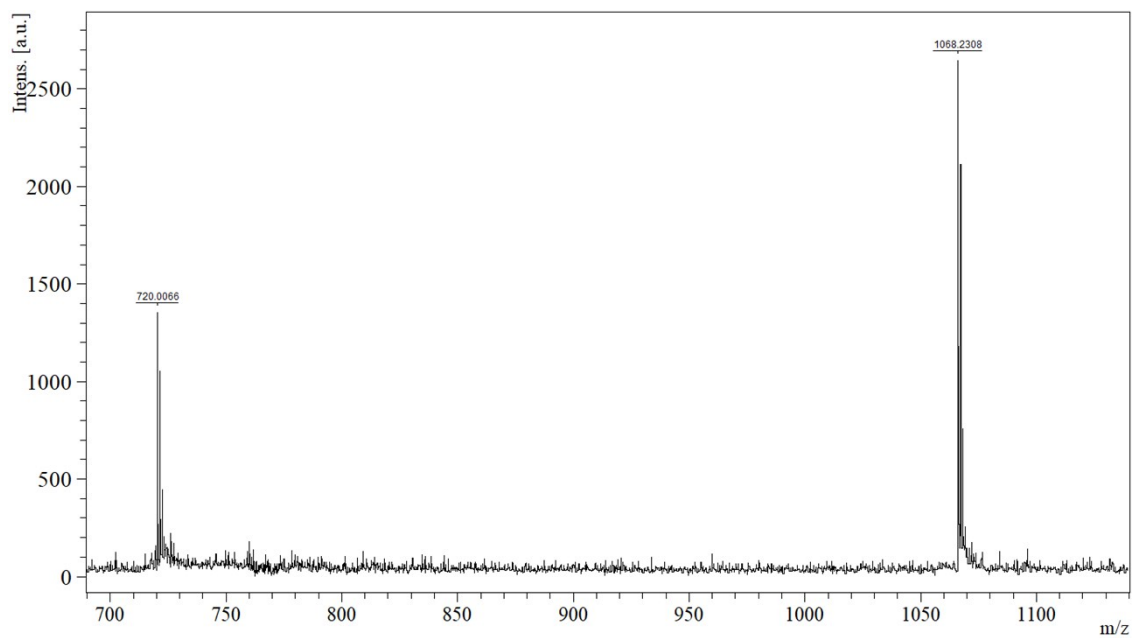

**Figure S27.** Copy of MALDI TOF spectra of compound **12**



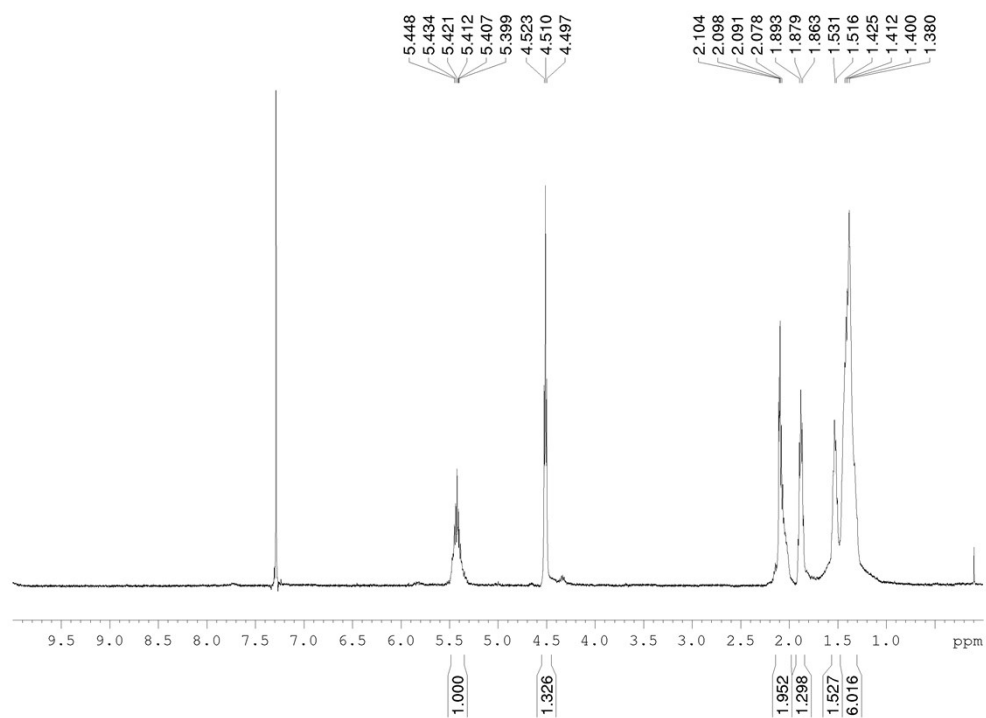

Figure S28. Copy of <sup>1</sup>H NMR spectra of compound 13

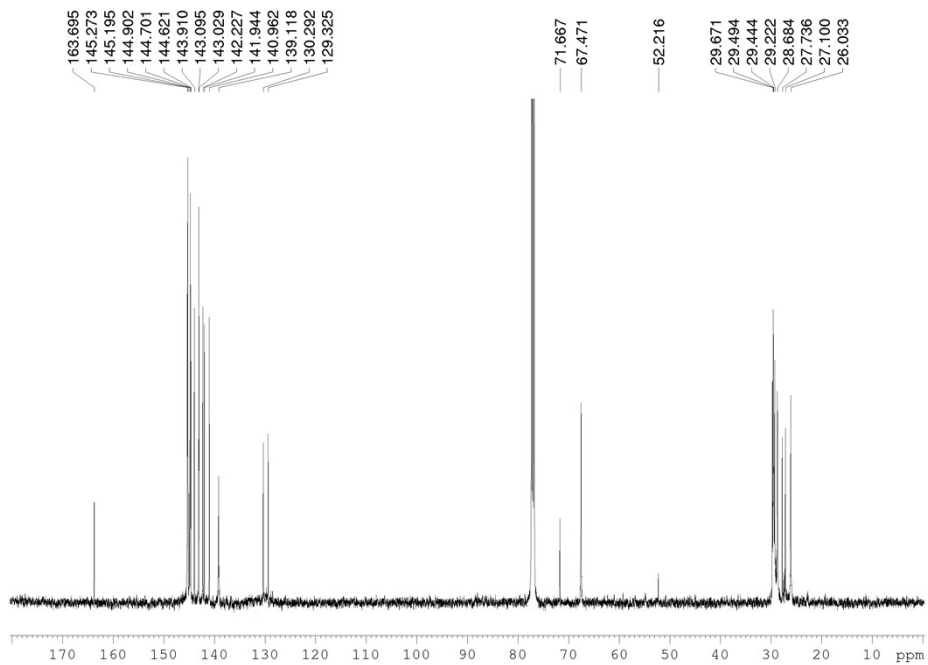

Figure S29. Copy of <sup>13</sup>C NMR spectra of compound 13

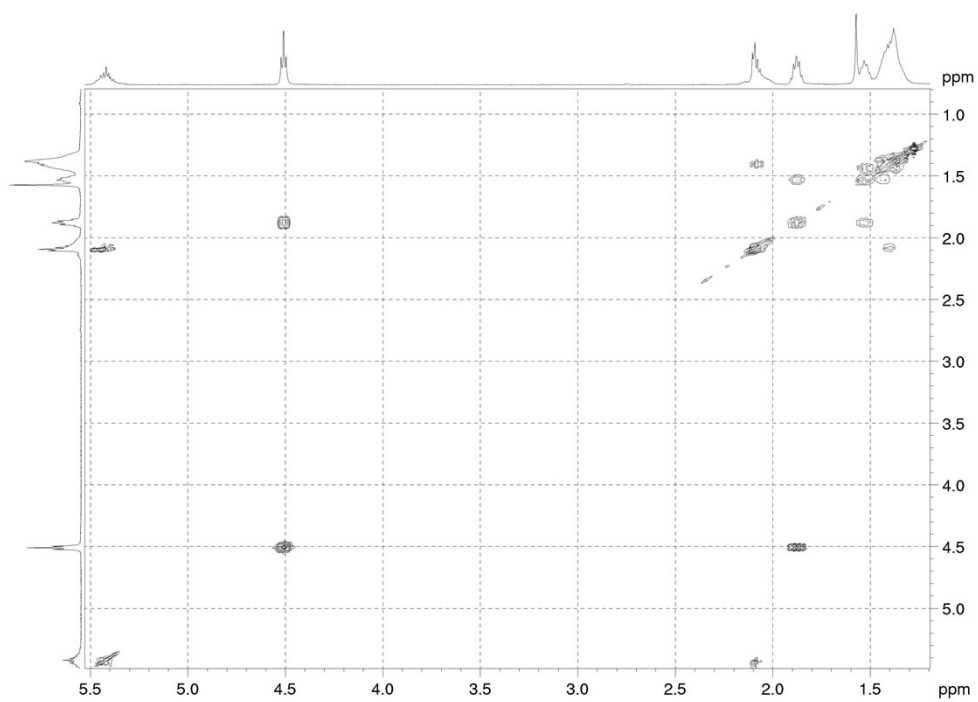

**Figure S30.** Copy of COSY spectra of compound **13**

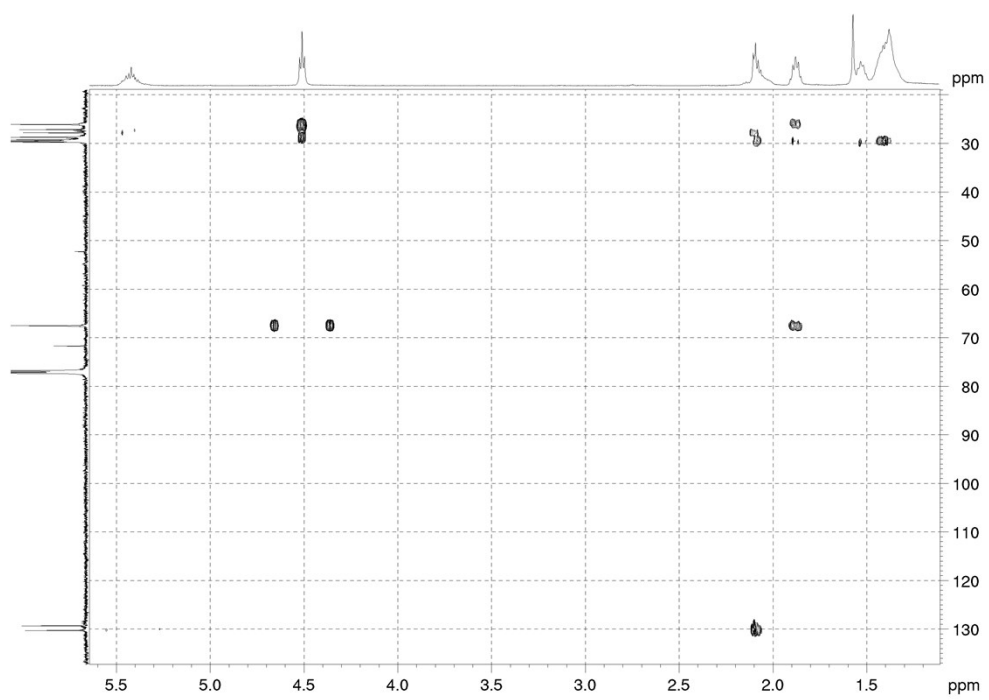

**Figure S31.** Copy of HMBC spectra of compound **13**

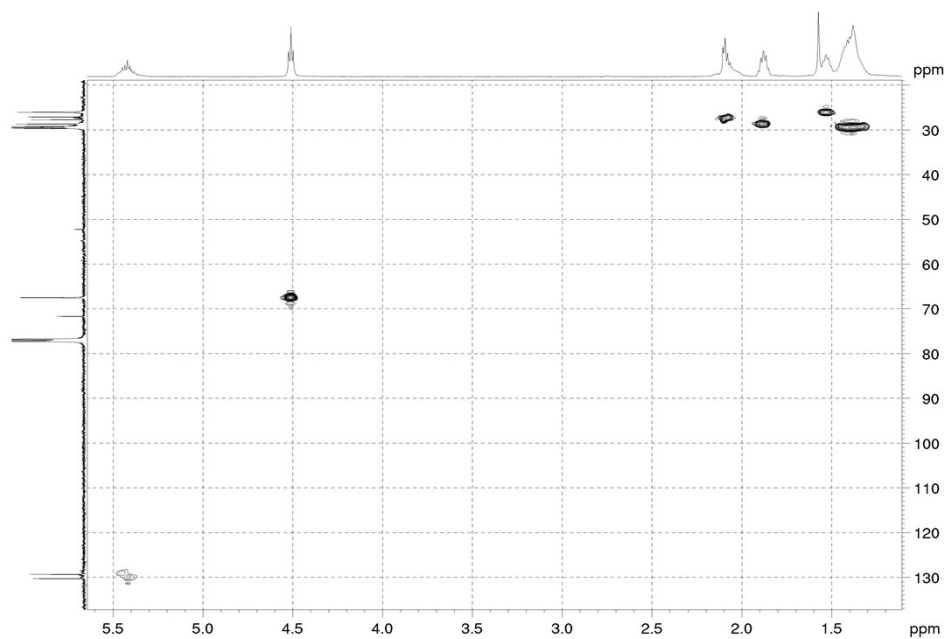

**Figure S32.** Copy of HSQC spectra of compound **13**

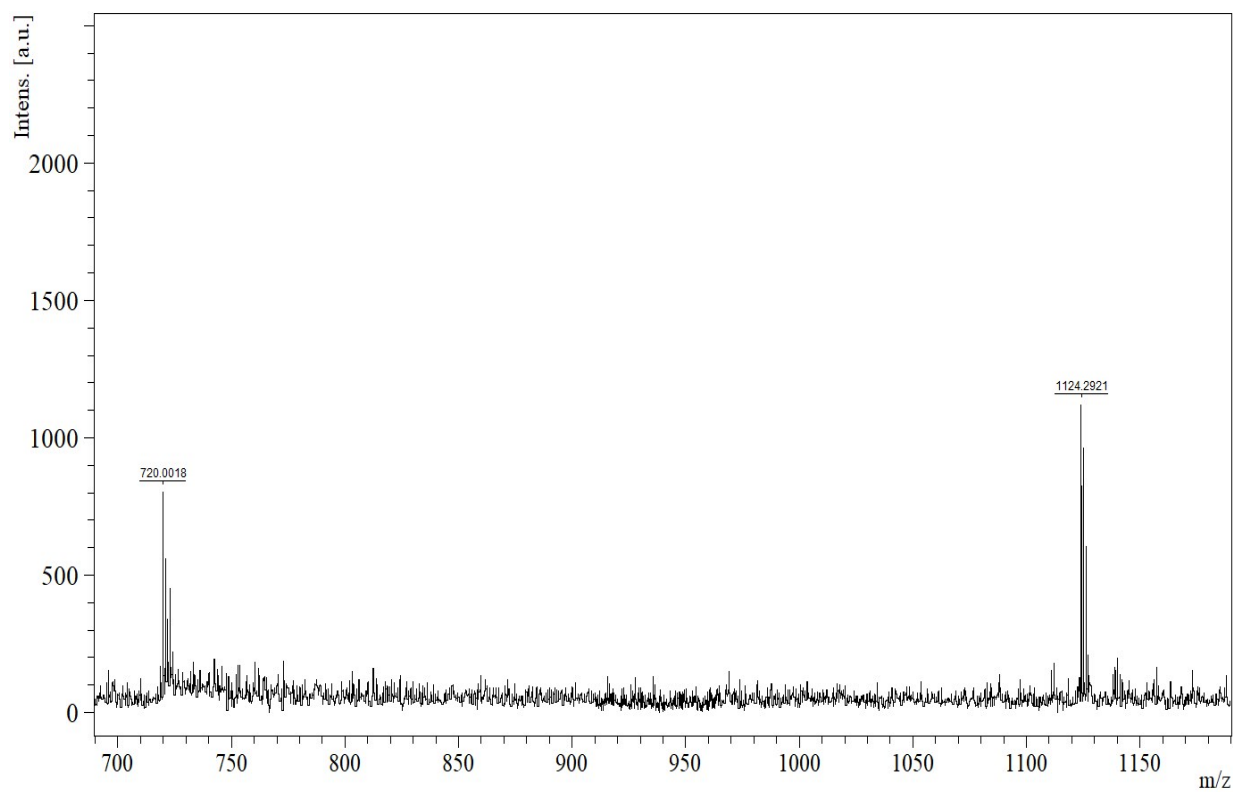

**Figure S33.** Copy of MALDI TOF spectra of compound **13**

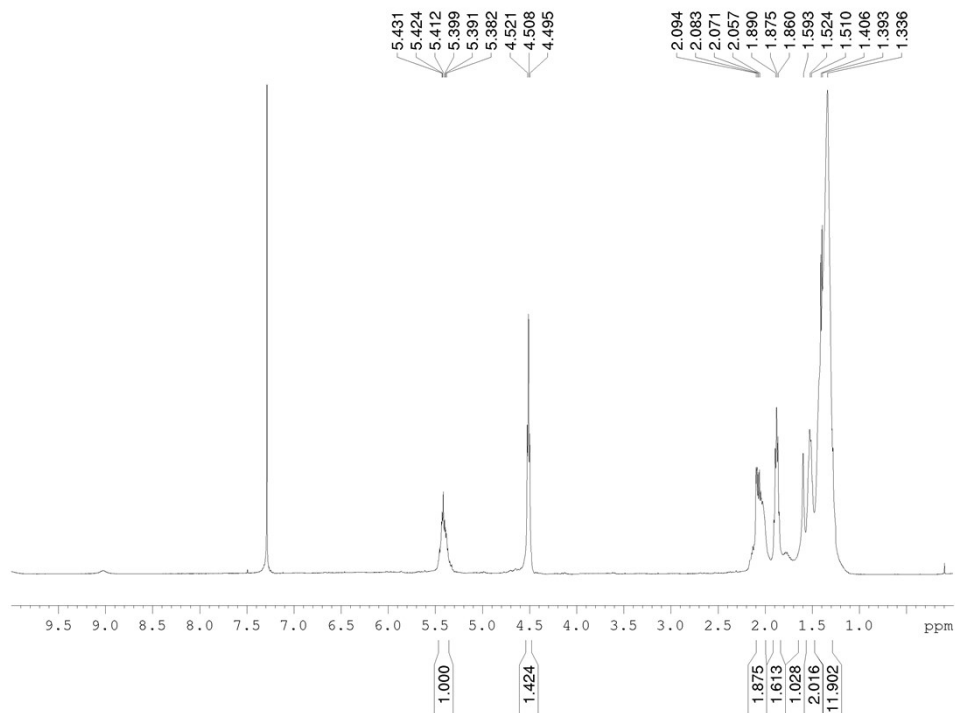

Figure S34. Copy of <sup>1</sup>H NMR spectra of compound 14

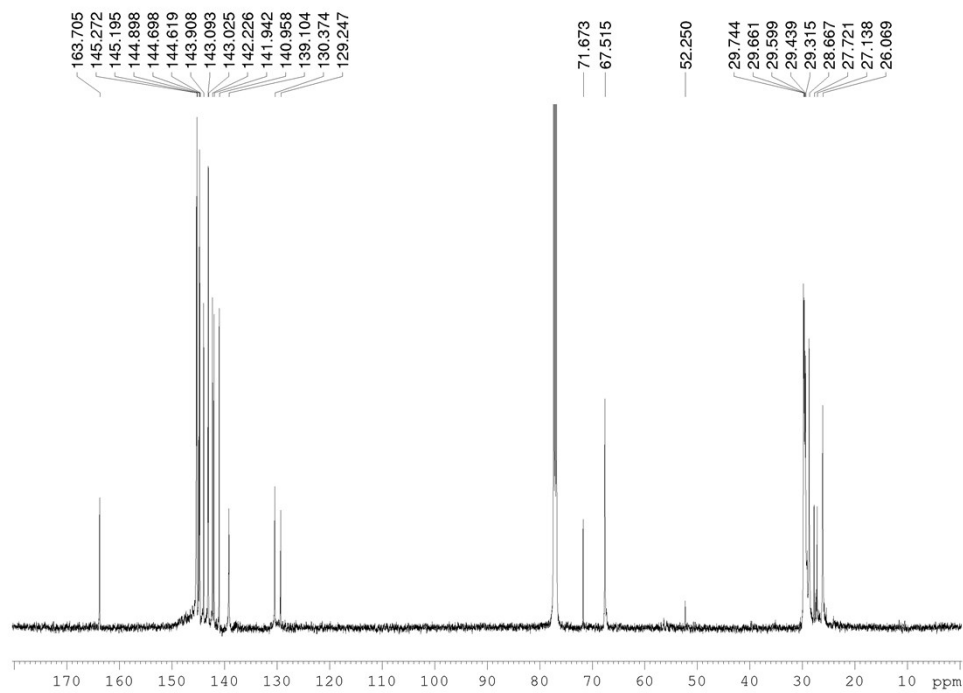

Figure S35. Copy of <sup>13</sup>C NMR spectra of compound 14

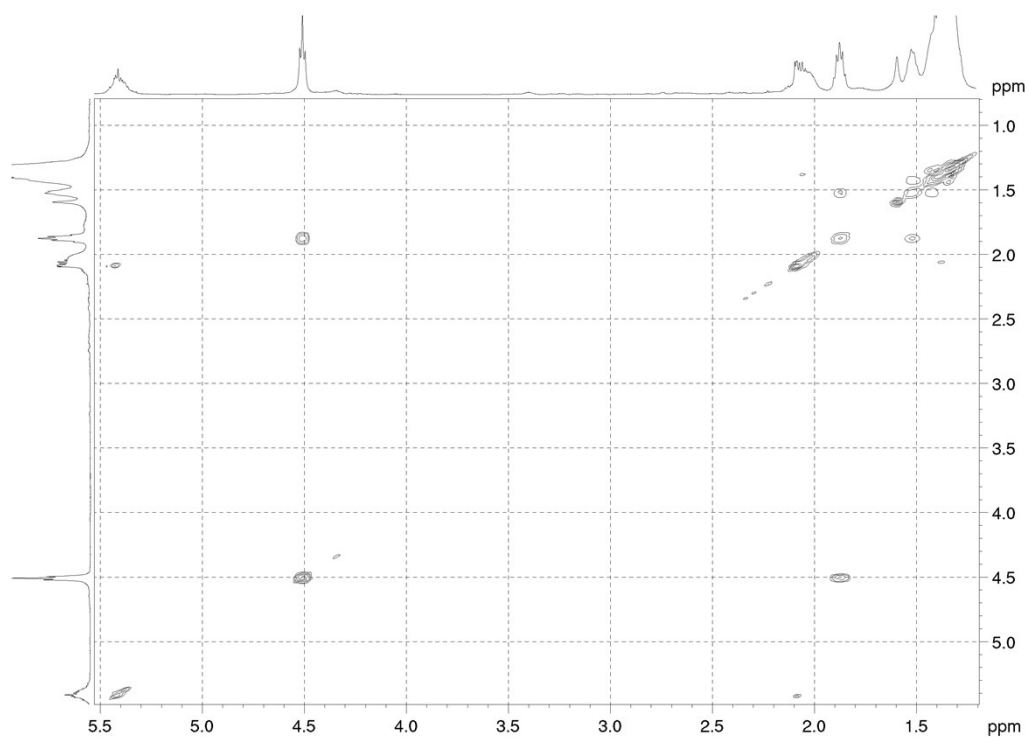

**Figure S36.** Copy of COSY spectra of compound **14**

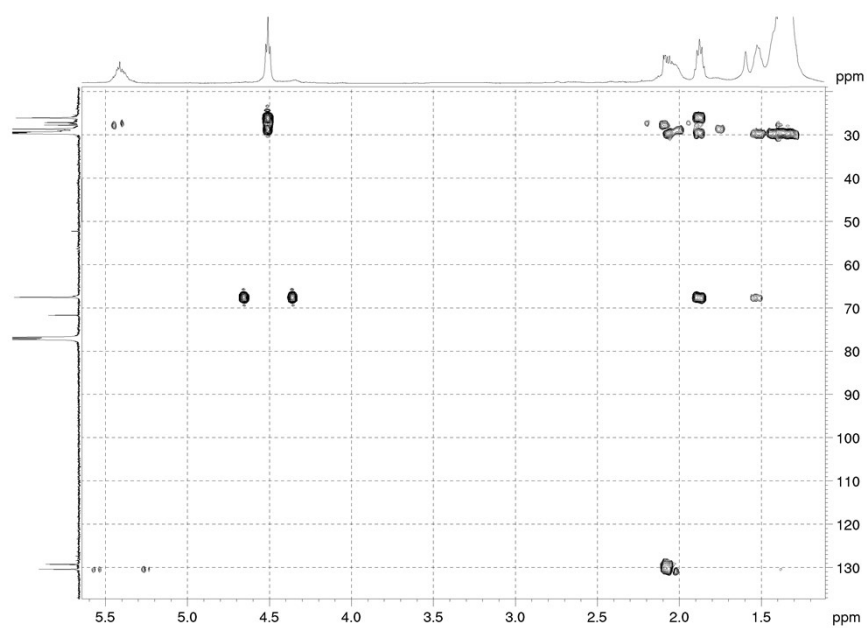

**Figure S37.** Copy of HMBC NMR spectra of compound **14**

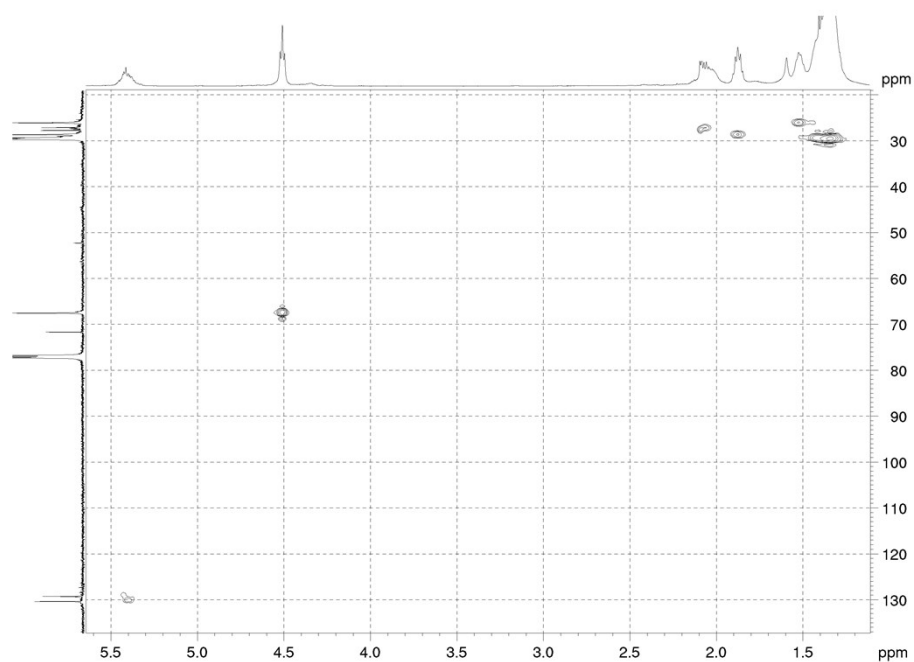

**Figure S38.** Copy of HSQC NMR spectra of compound **14**

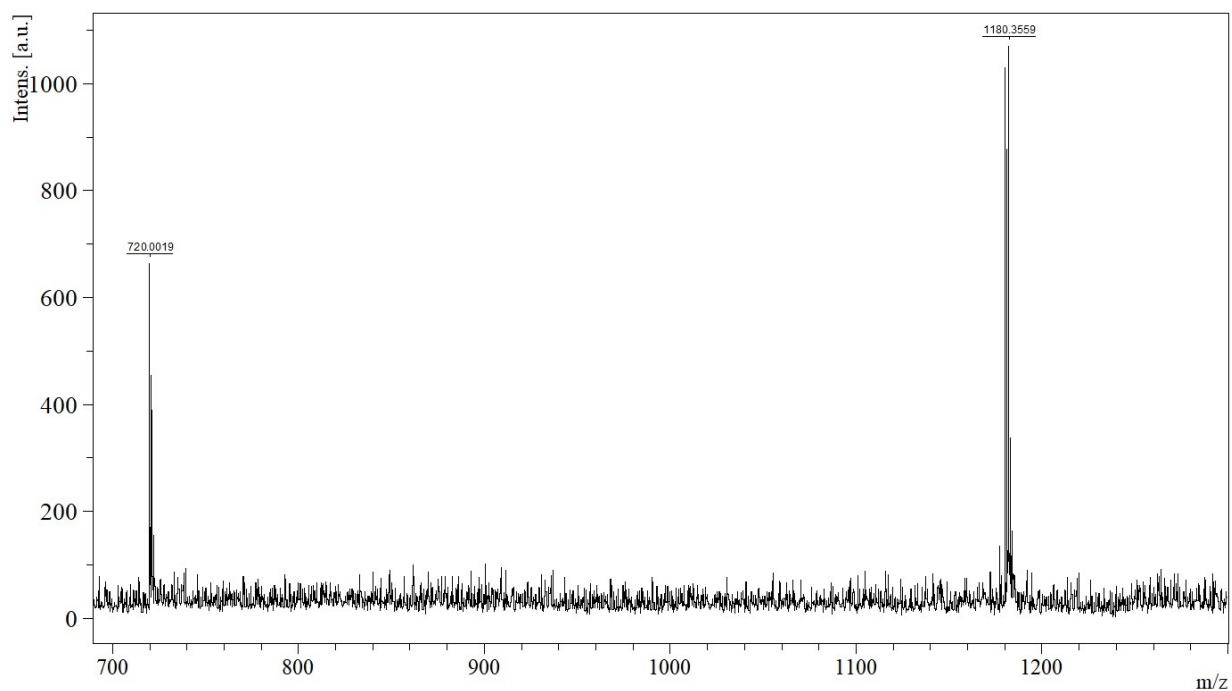

**Figure S39.** Copy of MALDI TOF spectra of compound **14**

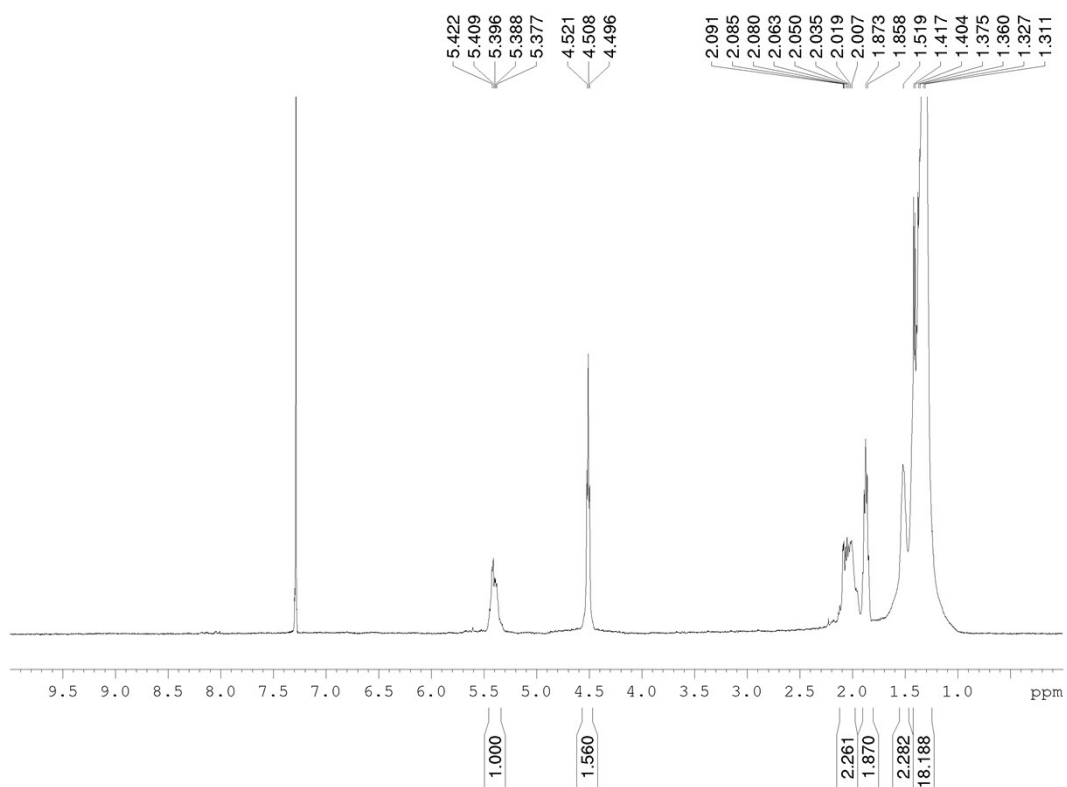

Figure S40. Copy of <sup>1</sup>H NMR spectra of compound 15

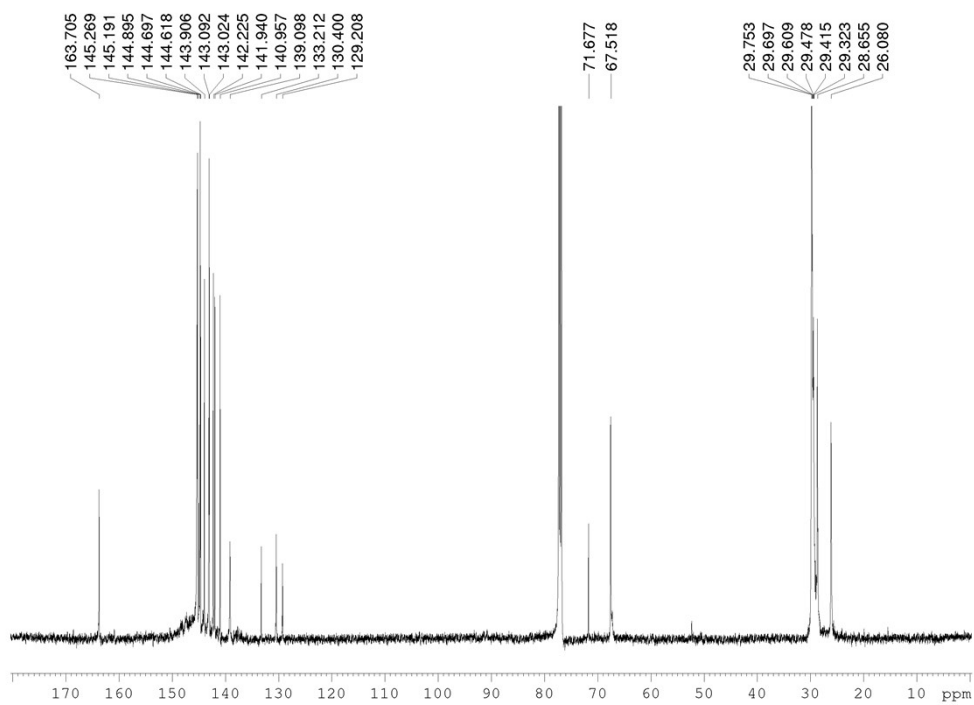

Figure S41. Copy of <sup>13</sup>C NMR spectra of compound 15

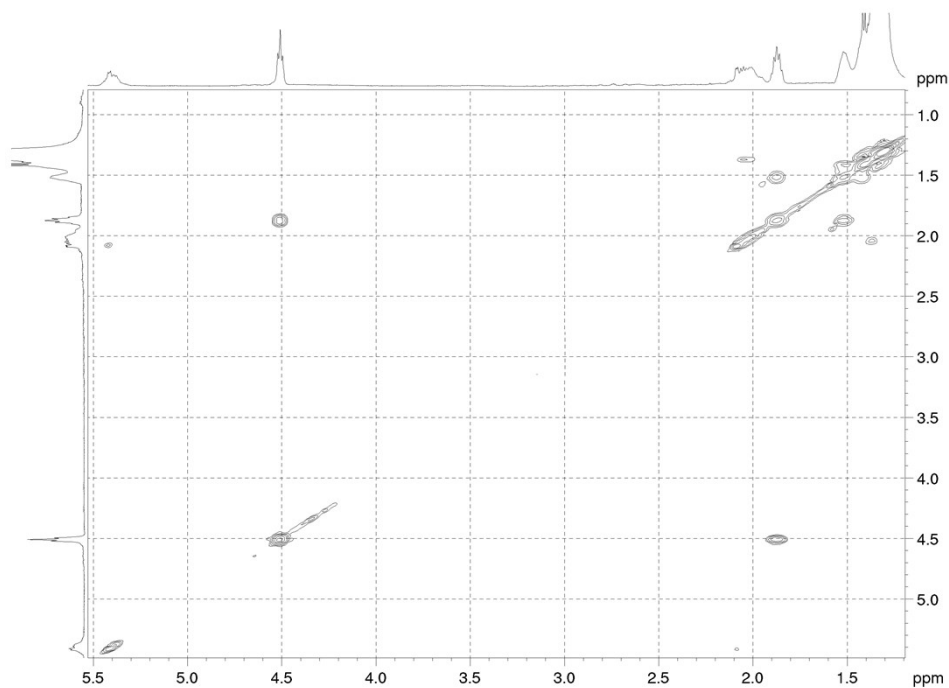

**Figure S42.** Copy of COSY NMR spectra of compound **15**

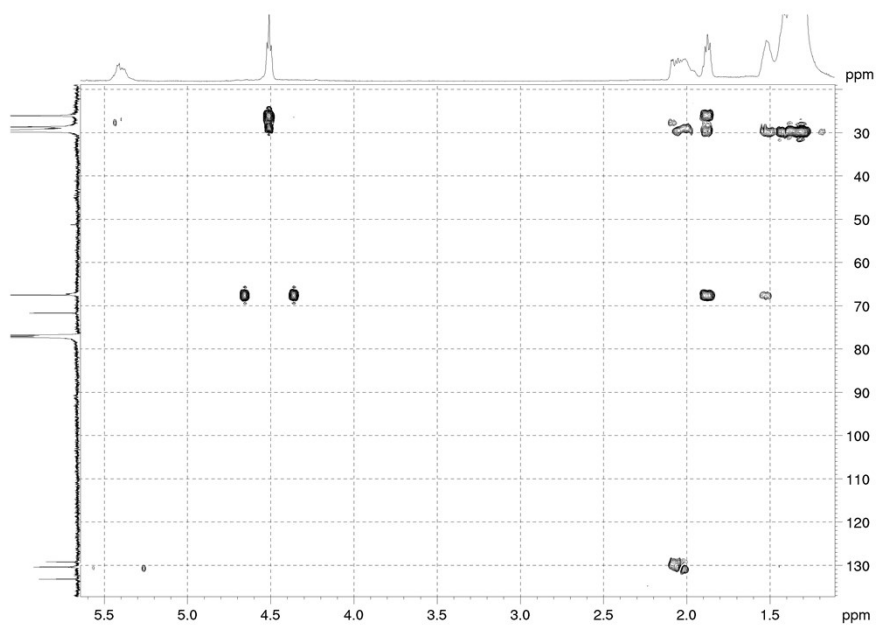

**Figure S43.** Copy of HMBC NMR spectra of compound **15**



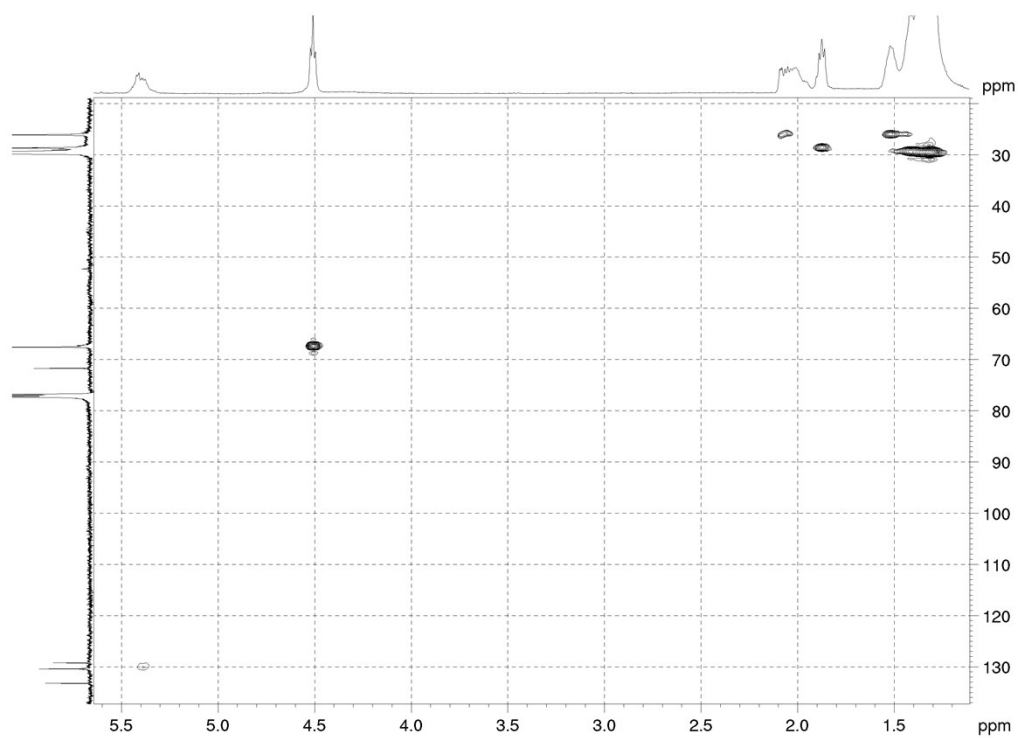

Figure S44. Copy of HSQC NMR spectra of compound **15**

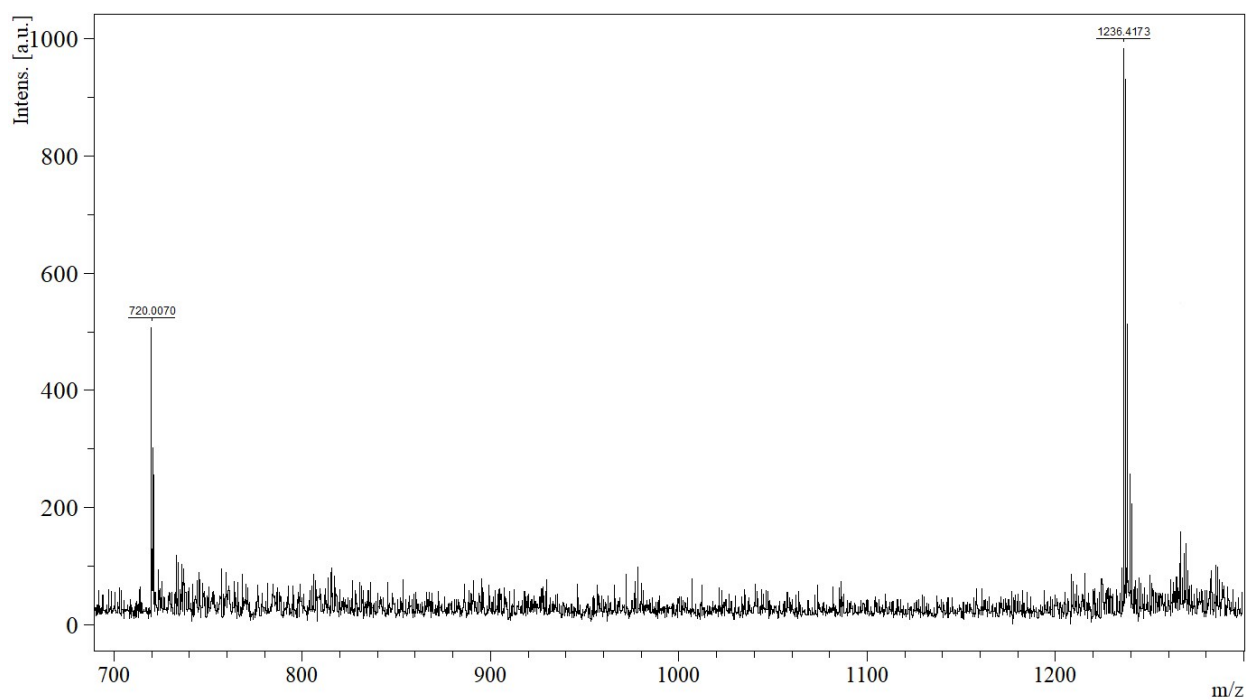

Figure S45. Copy of MALDI TOF spectra of compound **15**

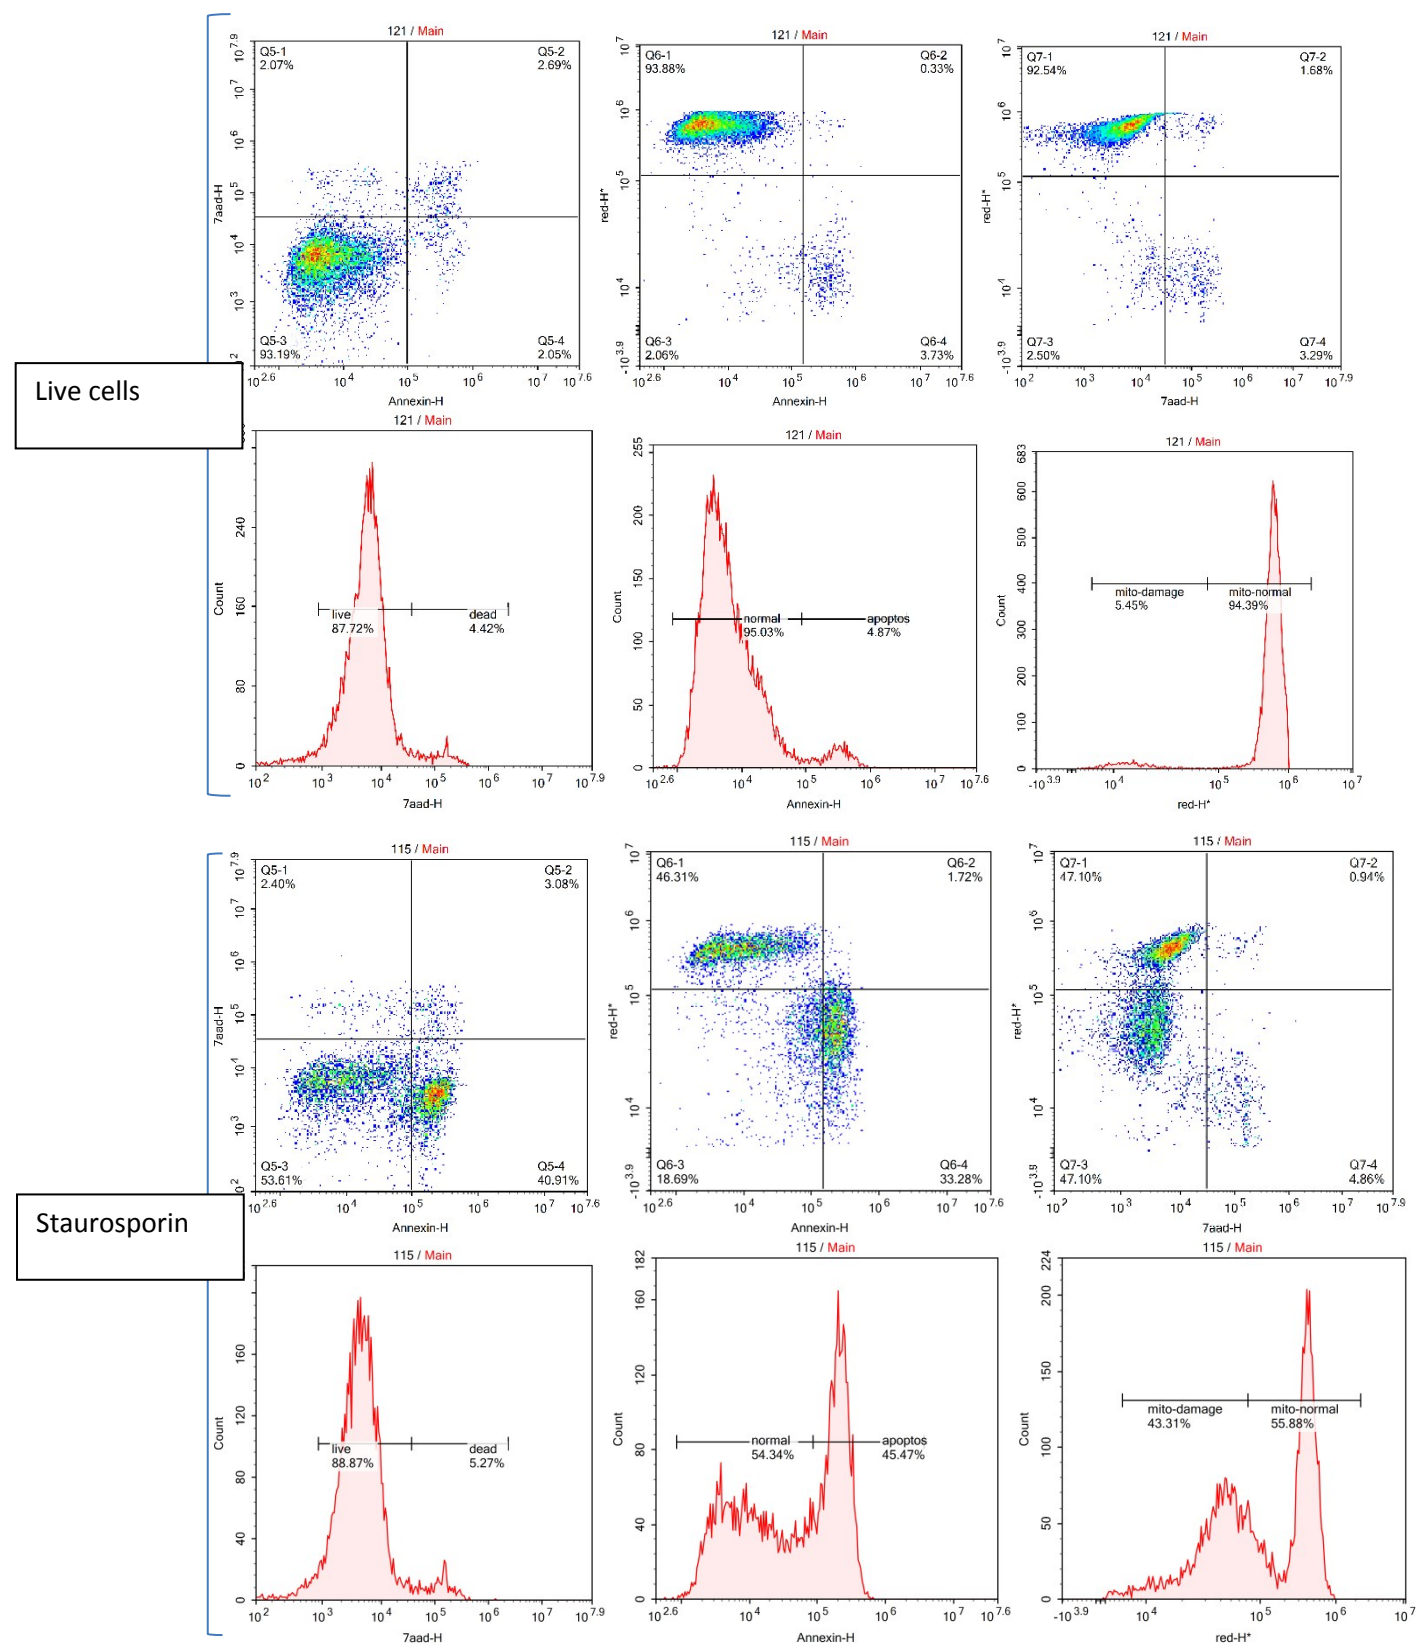

**Figure S46.** Detection of changes in mitochondrial membrane potential ( $\Delta\Psi$ ) and associated early and late apoptosis in Jurkat cells treated with staurosporine at a concentration of 0.2  $\mu\text{M}$  and live cells. C Cells were stained with MitoSenseRed, Annexin V — CF488A and 7-AAD. Incubation time made 4 hours.
